# Supplementary material for: Explorative Meta-Analysis of 417 Extant Archaeal Genomes to Predict Their Contribution to the Total Microbiome Functionality
Source: Microorganisms. 2021 Feb 13;9(2):381. doi: 10.3390/microorganisms9020381 (PMC7918521; doi:10.3390/microorganisms9020381)
Supplement: Supplementary file 1 [file microorganisms-09-00381-s001.xlsx]

## Sheet: Sheet1
#	Genome Name / Sample Name	Sequencing Status	Study Name	Sequencing Center	IMG Genome ID	Phylum	Class	Order	Family	Genus	Species	High Quality	Habitat	Isolation	Latitude	Longitude	pH	Salinity	Temperature Range	Size	GeC	GC * assembled	CDS Count * assembled	RNA Count * assembled	rRNA Count * assembled	5S rRNA Count * assembled	16S rRNA Count * assembled	18S rRNA Count * assembled	23S rRNA Count * assembled	28S rRNA Count * assembled	COG	Pfam Count * assembled	KEGG
1	Acidianus hospitalis W1	Finished	Acidianus hospitalis W1	University of Copenhagen	650716001	Crenarchaeota	Thermoprotei	Sulfolobales	Sulfolobaceae	Acidianus	Acidianus hospitalis	Yes	Fresh water						Thermophile	2137654	2404	34.15	2329	75	3	1	1	0	1	0	1351	1630	610
2	Acidianus manzaensis YN-25	Finished	Acidianus manzaensis Genome sequencing	Central South University	2740892001	Crenarchaeota	Thermoprotei	Sulfolobales	Sulfolobaceae	Acidianus	Acidianus manzaensis	Yes		volcanic hot spring						2687463	2823	30.62	2770	53	3	1	1	0	1	0	1671	1930	764
3	Acidilobus saccharovorans 345-15	Finished	Acidilobus saccharovorans 345-15	Russian Academy of Science, Centre Bioengineering	648028003	Crenarchaeota	Thermoprotei	Acidilobales	Acidilobaceae	Acidilobus	Acidilobus saccharovorans	Yes	Fresh water	solfataric field of Uzon caldera of Kamchatka Peninsula	54.5	159.96	3.5-4		Hyperthermophile	1496453	1547	57.22	1499	48	3	1	1	0	1	0	979	1134	509
4	Acidilobus sulfurireducens sp. nov.	Permanent Draft	Acidilobus sulfurireducens sp. nov.	SymBio Corporation	2504136013	Crenarchaeota	Thermoprotei	Acidilobales	Acidilobaceae	Acidilobus	Acidilobus sulfurireducens	Yes	Fresh water	Yellowstone National Park	44.599	-110.503	3		Thermophile	1648899	1925	57.52	1864	61	2	0	1	0	1	0	955	1221	573
5	Acidiplasma aeolicum V	Permanent Draft	Acidiplasma aeolicum strain:V Genome sequencing	California Institute of Technology	2681813050	Euryarchaeota	Thermoplasmata	Thermoplasmatales	Ferroplasmaceae	Acidiplasma	Acidiplasma aeolicum	Yes	Hot spring	Porto di Levante on Vulcano Island, in the Aeolian archipelago near Sicily, Italy					Mesophile	1634649	1751	34.5	1703	48	3	1	1	0	1	0	1159	1312	630
6	Acidiplasma cupricumulans BH2	Permanent Draft	Genome sequencing of polyextremophilic archaea of the family Ferroplasmaceae	Research Institute for Physical-Chemical Medicine of Ministry of Public Health of Russian Federation	2654587522	Euryarchaeota	Thermoplasmata	Thermoplasmatales	Ferroplasmaceae	Acidiplasma	Acidiplasma cupricumulans	Yes								1688729	1800	34.21	1753	47	3	1	1	0	1	0	1205	1345	635
7	Acidiplasma sp. MBA-1	Permanent Draft	Acidiplasma sp. MBA-1 Genome sequencing	Research Institute for Physical-Chemical Medicine of Ministry of Public Health of Russian Federation	2627853627	Euryarchaeota	Thermoplasmata	Thermoplasmatales	Ferroplasmaceae	Acidiplasma	Acidiplasma sp. MBA-1	Yes								1747364	1871	34.02	1820	51	3	1	1	0	1	0	1236	1389	648
8	Aciduliprofundum boonei T469	Finished	CSP_300154_796307	DOE Joint Genome Institute (JGI)	646564501	Euryarchaeota	unclassified	unclassified	unclassified	Aciduliprofundum	Aciduliprofundum boonei	Yes	Deep sea	Hydrothermally heated black smoker wall at the TAG site at the Mid Atlantic Ridge depth 3650m	-22.1689	-176.6			Thermophile	1486778	1587	39.16	1550	37	3	1	1	0	1	0	1054	1243	485
9	Aciduliprofundum sp. MAR08-339	Finished	CSP_300154_796307	DOE Joint Genome Institute (JGI)	2508501109	Euryarchaeota	unclassified	unclassified	unclassified	Aciduliprofundum	Aciduliprofundum sp. MAR08-339	Yes	Deep sea						Thermophile	1437090	1598	44.13	1531	67	4	1	1	0	1	0	1033	1198	482
10	Aeropyrum camini SY1, JCM 12091	Finished	Genome Sequence of Aeropyrum camini	Kyoto University	2554235461	Crenarchaeota	Thermoprotei	Desulfurococcales	Desulfurococcaceae	Aeropyrum	Aeropyrum camini	Yes	Hot spring	thermal vent ( [90027] deep-sea hydrothermal vent chimney, Suiyo Seamount, Izu-Bonin Arc) Japan Isolation date: November, 2000					Thermophile	1595994	1695	56.73	1645	50	3	1	1	0	1	0	1130	1214	565
11	Archaeoglobus fulgidus DSM 8774	Finished	Archaeoglobus fulgidus DSM 8774 Genome sequencing	Leibniz Institute, University of Bergen	2588253768	Euryarchaeota	Archaeoglobi	Archaeoglobales	Archaeoglobaceae	Archaeoglobus	Archaeoglobus fulgidus	Yes		North Sea, Norwegian Sector, oil platform					Thermophile	2316287	2613	48.08	2557	56	3	1	1	0	1	0	1759	1975	741
12	Archaeoglobus sulfaticallidus PM70-1, DSM 19444	Finished	Archaeoglobus sulfaticallidus PM70-1, DSM 19444	University of Uppsala	2522125074	Euryarchaeota	Archaeoglobi	Archaeoglobales	Archaeoglobaceae	Archaeoglobus	Archaeoglobus sulfaticallidus	Yes	Marine	Black rust formed on the steel surface of a seafloor borehole observatory (ODP CORK 1026B) exposed to hot ridge flank crustal fluids (64oC, water depth 2658 m)			7		Thermophile	2076931	2300	43.24	2240	60	3	1	1	0	1	0	1498	1733	679
13	Archaeoglobus veneficus SNP6, DSM 11195	Finished	A Genomic Encyclopedia of Bacteria and Archaea (GEBA)	DOE Joint Genome Institute (JGI)	2504136002	Euryarchaeota	Archaeoglobi	Archaeoglobales	Archaeoglobaceae	Archaeoglobus	Archaeoglobus veneficus	Yes	Deep sea	Black smoker wall, 3500m depth; Mid-Atlantic Ridge	-0.307616	-20.5668			Hyperthermophile	1901943	2194	47.05	2145	49	2	0	1	0	1	0	1450	1654	642
14	Caldisphaera lagunensis DSM 15908	Finished	A Genomic Encyclopedia of Bacteria and Archaea (GEBA)	DOE Joint Genome Institute (JGI)	2510065009	Crenarchaeota	Thermoprotei	Acidilobales	Caldisphaeraceae	Caldisphaera	Caldisphaera lagunensis	Yes	Hot spring	An acidic hot spring; Philippines					Hyperthermophile	1546846	1591	30.03	1528	63	3	1	1	0	1	0	1078	1193	557
15	Caldivirga maquilingensis IC-167	Finished	Caldivirga maquilingensis IC-167	DOE Joint Genome Institute (JGI)	641228483	Crenarchaeota	Thermoprotei	Thermoproteales	Thermoproteaceae	Caldivirga	Caldivirga maquilingensis	Yes	Hot spring	Acidic hot spring in the Philippines					Hyperthermophile	2077567	2011	43.1	1963	48	3	1	1	0	1	0	1270	1489	625
16	Candidatus Acidianus copahuensis ALE1	Permanent Draft	Candidatus Acidianus copahuensis ALE1	INDEAR Instituto de Agrobiotecnologia Rosario	2574180086	Crenarchaeota	Thermoprotei	Sulfolobales	Sulfolobaceae	Acidianus	Candidatus Acidianus copahuensis	Yes								2454023	2388	35.64	2332	56	3	1	1	0	1	0	1485	1715	683
17	Candidatus Methanomassiliicoccus intestinalis Issoire-Mx1	Finished	Methanomassiliicoccus sp. Mx1-Issoire Genome sequencing	Universite d'Auvergne	2554235424	Euryarchaeota	Thermoplasmata	Methanomassiliicoccales	Methanomassiliicoccaceae	Methanomassiliicoccus	Candidatus Methanomassiliicoccus intestinalis	Yes		Enrichment culture from feces						1931651	1876	41.26	1826	50	4	2	1	0	1	0	1171	1383	615
18	Candidatus Methanoperedens nitroreducens ANME-2d	Permanent Draft	Nitrate-driven anaerobic oxidation of methane reactor Metagenome	University of Queensland	2617271069	Euryarchaeota	Methanomicrobia	Methanosarcinales	Candidatus Methanoperedenaceae	Candidatus Methanoperedens	Candidatus Methanoperedens nitroreducens	Yes								3203386	3456	43.22	3396	60	3	1	1	0	1	0	1885	2383	784
19	Candidatus Methanoplasma termitum MpT1	Permanent Draft	Candidatus Methanoplasma termitum strain MpT1	Goettingen Genomics Laboratory	2608642196	Euryarchaeota	Thermoplasmata	Methanomassiliicoccales	Methanomassiliicoccaceae	Candidatus Methanoplasma	Candidatus Methanoplasma termitum	Yes	Host	hindgut of Cubitermes ugandensis					Mesophile	1488669	1453	49.21	1404	49	3	1	1	0	1	0	930	1099	504
20	Candidatus Nitrosocaldus islandicus	Finished	Candidatus Nitrosocaldus islandicus genome sequencing	University of Vienna	2788500263	Thaumarchaeota	Nitrososphaeria	Candidatus Nitrosocaldales	Candidatus Nitrosocaldaceae	Candidatus Nitrosocaldus	Candidatus Nitrosocaldus islandicus	Yes		73C hot spring biofilm, pH 6.5						1617394	1790	41.54	1746	44	3	1	1	0	1	0	990	1133	532
21	Candidatus Nitrosocosmicus exaquare G61	Finished	Candidatus Nitrosocosmicus exaquare G61 genome	University of Waterloo	2718217702	Thaumarchaeota	Nitrososphaeria	Nitrososphaerales	Nitrososphaeraceae	Candidatus Nitrosocosmicus	Candidatus Nitrosocosmicus exaquare	Yes		municipal WWTP	43.54	-80.25				2989777	3237	33.94	3196	41	5	1	2	0	2	0	1344	1725	584
22	Candidatus Nitrosopumilus koreensis AR1	Finished	Candidatus Nitrosopumilus koreensis AR1	Chungbuk National University	2518645532	Thaumarchaeota	unclassified	Nitrosopumilales	Nitrosopumilaceae	Nitrosopumilus	Candidatus Nitrosopumilus koreensis	Yes								1639964	1931	34.18	1890	41	3	1	1	0	1	0	924	1155	549
23	Candidatus Nitrosopumilus sediminis AR2	Finished	Candidatus Nitrosopumilus sediminis AR2	Chungbuk National University	2518645576	Thaumarchaeota	unclassified	Nitrosopumilales	Nitrosopumilaceae	Nitrosopumilus	Candidatus Nitrosopumilus sediminis	Yes								1690905	2014	33.59	1974	40	3	1	1	0	1	0	983	1214	567
24	Candidatus Nitrososphaera evergladensis SR1	Finished	Candidatus Nitrososphaera evergladensis SR1 Genome sequencing	University of Florida	2585427666	Thaumarchaeota	Nitrososphaeria	Nitrososphaerales	Nitrososphaeraceae	Nitrososphaera	Candidatus Nitrososphaera evergladensis	Yes	Soil	Everglades soil	29.617	-82.3175				2954373	3542	50.14	3499	43	3	1	1	0	1	0	1425	1821	656
25	Candidatus Nitrosotalea devanaterra NDEV1	Finished	Genome sequencing of Candidatus Nitrosotalea devanaterra NDEV1	University of Aberdeen	2757320681	Thaumarchaeota	unclassified	unclassified	unclassified	Candidatus Nitrosotalea	Candidatus Nitrosotalea devanaterra	Yes								1805304	2113	37.07	2067	46	3	1	1	0	1	0	1030	1289	568
26	Cuniculiplasma divulgatum PM4	Finished	Genome sequencing of Cuniculiplasma divulgatum PM4	Baltic Federal University	2773858044	Euryarchaeota	Thermoplasmata	Thermoplasmatales	Cuniculiplasmataceae	Cuniculiplasma	Cuniculiplasma divulgatum	Yes		acidic streamer	53.3822	-4.3525				1878916	1916	37.16	1864	52	3	1	1	0	1	0	1150	1317	544
27	Cuniculiplasma divulgatum S5	Finished	Genome sequencing of Cuniculiplasma divulgatum S5	Baltic Federal University	2773858060	Euryarchaeota	Thermoplasmata	Thermoplasmatales	Cuniculiplasmataceae	Cuniculiplasma	Cuniculiplasma divulgatum	Yes		acidic streamer	37.6	-7.1				1938699	2009	37.3	1957	52	3	1	1	0	1	0	1186	1365	544
28	Desulfurococcus kamchatkensis 1221n	Finished	Desulfurococcus kamchatkensis 1221n	Russian Academy of Science, Centre Bioengineering	643348540	Crenarchaeota	Thermoprotei	Desulfurococcales	Desulfurococcaceae	Desulfurococcus	Desulfurococcus amylolyticus	Yes	Fresh water	Sediments of Treshchinny Spring (Uzon Caldera, Kamchatka, Russia)	54.593	160.273	5.5-7.5		Hyperthermophile	1365223	1521	45.34	1471	50	3	1	1	0	1	0	896	1027	437
29	Desulfurococcus mucosus 07/1, DSM 2162	Finished	A Genomic Encyclopedia of Bacteria and Archaea (GEBA)	DOE Joint Genome Institute (JGI)	649633040	Crenarchaeota	Thermoprotei	Desulfurococcales	Desulfurococcaceae	Desulfurococcus	Desulfurococcus mucosus	Yes	Hot spring	Hot solfataric spring; Iceland	65.05	-16.8			Hyperthermophile	1314639	1421	53.14	1371	50	3	1	1	0	1	0	944	1022	413
30	Ferroglobus placidus AEDII12DO, DSM 10642	Finished	Comparative genomics of the Archaea	DOE Joint Genome Institute (JGI)	646564534	Euryarchaeota	Archaeoglobi	Archaeoglobales	Archaeoglobaceae	Ferroglobus	Ferroglobus placidus	Yes	Hot spring	Hallow submarine hydrothermal system at Vulcano Italy	38.4154	14.9609	7		Hyperthermophile	2196266	2622	44.14	2567	55	3	1	1	0	1	0	1625	1936	727
31	Ferroplasma acidiphilum Y	Finished	Ferroplasma acidiphilum Y Genome sequencing	Max Planck Institute for Chemical Ecology	2740892000	Euryarchaeota	Thermoplasmata	Thermoplasmatales	Ferroplasmaceae	Ferroplasma	Ferroplasma acidiphilum	Yes	Host	pyrite-leaching pilot plant					Mesophile	1826943	1868	36.49	1819	49	3	1	1	0	1	0	1240	1401	614
32	Fervidicoccus fontis Kam940	Finished	Fervidicoccus fontis Kam940	Russian Academy of Science, Centre Bioengineering	2513237177	Crenarchaeota	Thermoprotei	Fervidicoccales	Fervidicoccaceae	Fervidicoccus	Fervidicoccus fontis	Yes		terrestrial hot springs	54.5	159.96	5.5-6		Thermophile	1319206	1430	37.47	1385	45	3	1	1	0	1	0	925	1021	463
33	Geoglobus ahangari 234	Finished	Geoglobus ahangari 234	Michigan State University, University of Massachusetts Medical School (UMMS)	2808606696	Euryarchaeota	Archaeoglobi	Archaeoglobales	Archaeoglobaceae	Geoglobus	Geoglobus ahangari	Yes	Hydrothermal vent	Guaymas Basin	27	-111	7	Euryhaline	Hyperthermophile	1770093	2080	53.11	2030	50	2	0	1	0	1	0	1464	1652	657
34	Haladaptatus cibarius D43	Permanent Draft	Haladaptatus cibarius D43	Korea Basic Science Institute (KBSI)	2582580505	Euryarchaeota	Halobacteria	Halobacteriales	Halobacteriaceae	Haladaptatus	Haladaptatus cibarius	Yes	Fermented food product	salt-fermented seafood					Mesophile	3926724	4149	57.76	4092	57	6	2	3	0	1	0	2188	2671	869
35	Haladaptatus litoreus CGMCC 1.7737	Permanent Draft	Genomic Encyclopedia of Type Strains, Phase III (KMG-III): the genomes of soil and plant-associated and newly described type strains	DOE Joint Genome Institute (JGI)	2681812914	Euryarchaeota	Halobacteria	Halobacteriales	Halobacteriaceae	Haladaptatus	Haladaptatus litoreus	Yes								4671707	5136	56.99	5073	63	5	2	1	0	2	0	2556	3113	968
36	Haladaptatus paucihalophilus DX253	Permanent Draft	Haladaptatus paucihalophilus strain DX253 sequencing	University of South Carolina	2507262000	Euryarchaeota	Halobacteria	Halobacteriales	Halobacteriaceae	Haladaptatus	Haladaptatus paucihalophilus	Yes		Low-salt, sulfide- and sulfur-rich spring (Zodletone Spring) in south-western Oklahoma, USA	35.0595	-98.4705		Halophile	Mesophile	4284805	4415	61.82	4363	52	2	0	1	0	1	0	2487	2997	980
37	Haladaptatus sp. R4	Permanent Draft	Haladaptatus sp. R4 genome sequencing	The University of Burdwan	2690315686	Euryarchaeota	Halobacteria	Halobacteriales	Halobacteriaceae	Haladaptatus	Haladaptatus sp. R4	Yes		saltern	21.66	87.54				4891005	5410	60.18	5345	65	7	3	3	0	1	0	2547	3501	1118
38	Haladaptatus sp. W1	Permanent Draft	Haladaptatus sp. W1 W1 Genome sequencing	University of Essex	2728369538	Euryarchaeota	Halobacteria	Halobacteriales	Halobacteriaceae	Haladaptatus	Haladaptatus sp. W1	Yes		Warham Salt Marsh creek	52.9622	0.8963				5189880	5886	60.32	5817	69	10	4	2	0	4	0	2570	3596	961
39	Halalkalicoccus jeotgali B3, DSM 18796	Finished	Halalkalicoccus jeotgali B3, DSM 18796	Kyunghee University	648028029	Euryarchaeota	Halobacteria	Halobacteriales	Halobacteriaceae	Halalkalicoccus	Halalkalicoccus jeotgali	Yes	Fermented food product	Salted shrimp jeotgal (traditional Korean fermented seafood); Republic of Korea				Halophile	Mesophile	3698650	3925	62.52	3873	52	3	1	1	0	1	0	2066	2593	904
40	Halalkalicoccus paucihalophilus DSM 24557	Permanent Draft	Halalkalicoccus paucihalophilus strain:DSM 24557 Genome sequencing and assembly	Georg-August-University Goettingen, Genomic and Applied Microbiology, Goettingen Genomics Laboratory	2684622629	Euryarchaeota	Halobacteria	Halobacteriales	Halobacteriaceae	Halalkalicoccus	Halalkalicoccus paucihalophilus	Yes		soil					Mesophile	3977859	4245	61.67	4182	63	3	1	1	0	1	0	2289	2835	954
41	Halapricum salinum CBA1105	Permanent Draft	Genome sequencing of Halapricum salinum CBA1105	Korea Basic Science Institute (KBSI)	2630968753	Euryarchaeota	Halobacteria	Halobacteriales	Haloarculaceae	Halapricum	Halapricum salinum	Yes								3451492	3497	63.73	3447	50	3	1	1	0	1	0	1907	2375	803
42	Halarchaeum acidiphilum JCM 16109	Permanent Draft	Halarchaeum acidiphilum MH1-52-1	Japan Agency for Marine-Earth Science and Technology	2648501819	Euryarchaeota	Halobacteria	Halobacteriales	Halobacteriaceae	Halarchaeum	Halarchaeum acidiphilum	Yes		solar salt imported into Japan from Australia						2617647	2884	67.4	2830	54	4	2	1	0	1	0	1510	1919	792
43	Haloarchaeobius iranensis IBRC-M 10013	Permanent Draft	Genomic Encyclopedia of Archaeal and Bacterial Type Strains, Phase II (KMG-II): from individual species to whole genera	DOE Joint Genome Institute (JGI)	2651870127	Euryarchaeota	Halobacteria	Halobacteriales	Halobacteriaceae	Haloarchaeobius	Haloarchaeobius iranensis	Yes								3768606	3920	67.31	3866	54	6	2	2	0	2	0	2053	2511	876
44	haloarchaeon 3A1_DGR	Permanent Draft	Draft genome sequence of an extreme haloarchaeon 3A1-DGR	Directorate of Groundnut Research (Indian Council of Agricultural Research)	2600255154	Euryarchaeota	Halobacteria	Halobacteriales	unclassified	unclassified	haloarchaeon 3A1_DGR	Yes		isolated from a salt crystallizer pond of the Little Rann of Kutch, India				Hypersaline		2880497	2957	67.68	2813	144	3	1	1	0	1	0	1745	2009	825
45	Haloarcula amylolytica JCM 13557	Permanent Draft	Haloarchaeal genomes	University of California, Davis	2554235482	Euryarchaeota	Halobacteria	Halobacteriales	Haloarculaceae	Haloarcula	Haloarcula amylolytica	Yes	Fresh water	Aibi salt lake in Xinjiang, China	43.793	87.627		Halophile	Mesophile	4225424	4230	62.13	4156	74	7	2	3	0	2	0	2249	2741	998
46	Haloarcula argentinensis DSM 12282	Permanent Draft	Haloarchaeal genomes	University of California, Davis	2554235479	Euryarchaeota	Halobacteria	Halobacteriales	Haloarculaceae	Haloarcula	Haloarcula argentinensis	Yes		Salinas Chica on the Valdez Peninsula in Chubut, Argentina	-42.4987	-64.0001		Halophile	Mesophile	4147107	4180	61.12	4105	75	8	1	4	0	3	0	2220	2686	995
47	Haloarcula californiae BJGN-2, ATCC 33799	Permanent Draft	Haloarcula californiae ATCC 33799	University of California, Davis	2531839655	Euryarchaeota	Halobacteria	Halobacteriales	Haloarculaceae	Haloarcula	Haloarcula californiae	Yes		salt brine, Baja California, Mexico	30.8406	-115.284				4404932	4435	60.82	4373	62	6	3	1	0	2	0	2317	2857	1009
48	Haloarcula hispanica CGMCC 1.2049	Finished	Haloarcula hispanica CGMCC 1.2049	Chinese Center for Disease Control and Prevention	2511231068	Euryarchaeota	Halobacteria	Halobacteriales	Haloarculaceae	Haloarcula	Haloarcula hispanica	Yes		solar saltern	38.35	-0.48				3890005	3919	62.45	3859	60	11	4	3	0	3	0	2212	2673	986
49	Haloarcula japonica DSM 6131	Permanent Draft	Haloarcula japonica DSM 6131	University of California, Davis	2534681902	Euryarchaeota	Halobacteria	Halobacteriales	Haloarculaceae	Haloarcula	Haloarcula japonica	Yes		saltern soil				Halophile	Mesophile	4280359	4288	61.18	4235	53	8	2	3	0	3	0	2311	2814	1044
50	Haloarcula marismortui ATCC 43049	Finished	Haloarcula marismortui ATCC 43049	Institute for Systems Biology	638154503	Euryarchaeota	Halobacteria	Halobacteriales	Haloarculaceae	Haloarcula	Haloarcula marismortui	Yes	Marine	Dead Sea	31.4	35.423		Halophile	Mesophile	4274642	4387	61.12	4325	62	10	4	3	0	3	0	2274	2831	1013
51	Haloarcula quadrata DSM 11927	Permanent Draft	Genomic Encyclopedia of Archaeal and Bacterial Type Strains, Phase II (KMG-II): from individual species to whole genera	DOE Joint Genome Institute (JGI)	2778260947	Euryarchaeota	Halobacteria	Halobacteriales	Haloarculaceae	Haloarcula	Haloarcula quadrata	Yes		brine pool					Mesophile	4459149	4873	60.85	4655	218	10	4	3	0	3	0	2498	3007	996
52	Haloarcula rubripromontorii SL3	Permanent Draft	Haloarcula rubripromontorii SL3 genome sequencing	UPR- Mayaguez	2651869823	Euryarchaeota	Halobacteria	Halobacteriales	Haloarculaceae	Haloarcula	Haloarcula rubripromontorii	Yes								3970989	4113	62.05	4054	59	9	3	2	0	4	0	2264	2727	999
53	Haloarcula sinaiiensis BJSG-2	Permanent Draft	Haloarcula sinaiiensis ATCC 33800	San Diego State University	2508501017	Euryarchaeota	Halobacteria	Halobacteriales	Haloarculaceae	Haloarcula	Haloarcula sinaiiensis	Yes		salt brine, Israel						4524388	4593	60.77	4538	55	4	2	1	0	1	0	2377	2885	1044
54	Haloarcula sp. CBA1115	Finished	Haloarcula sp. CBA1115 Genome sequencing	Kyunghee University	2627853826	Euryarchaeota	Halobacteria	Halobacteriales	Haloarculaceae	Haloarcula	Haloarcula sp. CBA1115	Yes								4225046	4320	61.95	4259	61	10	4	3	0	3	0	2277	2776	1001
55	Haloarcula sp. CBA1128	Permanent Draft	Genome sequencing of Haloarcula sp. CBA1128 - Korea Basic Science Institute (KBSI)	Korea Basic Science Institute (KBSI)	2684622664	Euryarchaeota	Halobacteria	Halobacteriales	Haloarculaceae	Haloarcula	Haloarcula sp. CBA1128	Yes								4184591	4244	61.95	4186	58	10	4	3	0	3	0	2279	2764	993
56	Haloarcula sp. K1	Permanent Draft	Haloarcula sp. strain K1 genome sequencing	Institute of Microbial Technology	2690315681	Euryarchaeota	Halobacteria	Halobacteriales	Haloarculaceae	Haloarcula	Haloarcula sp. K1	Yes		Soil						4331797	4443	61.67	4393	50	4	2	2	0	0	0	2322	2806	1020
57	Haloarcula taiwanensis Taiwanensis	Finished	Haloarcula sp. Taiwanensis genome sequencing	National Taiwan University	2775506935	Euryarchaeota	Halobacteria	Halobacteriales	Haloarculaceae	Haloarcula	Haloarcula taiwanensis	Yes								3721706	3909	62.5	3855	54	7	3	2	0	2	0	2174	2559	982
58	Haloarcula vallismortis DSM 3756	Permanent Draft	Genomic Encyclopedia of Archaeal and Bacterial Type Strains, Phase II (KMG-II): from individual species to whole genera	DOE Joint Genome Institute (JGI)	2693429892	Euryarchaeota	Halobacteria	Halobacteriales	Haloarculaceae	Haloarcula	Haloarcula vallismortis	Yes		Salt pools, Bad Water Point, Death Valley, CA	36.4556	-116.867			Mesophile	3896637	4094	61.79	4010	84	7	3	2	0	2	0	2220	2665	990
59	Halobacteriaceae archaeon G22	Permanent Draft	Halobacteriaceae archaeon G22	University of California, San Diego	2568526208	Euryarchaeota	Halobacteria	Haloferacales	Halorubraceae	Candidatus Halobonum	Candidatus Halobonum tyrrellensis	Yes								3675087	3492	70.12	3446	46	2	1	0	0	1	0	2025	2435	844
60	Halobacteriaceae archaeon HSR2	Finished	Halobacteriaceae archaeon HSR2	Institute for coastal marine environment, CNR	2639763150	Euryarchaeota	Halobacteria	Halobacteriales	Halobacteriaceae	Halanaeroarchaeum	Halanaeroarchaeum sulfurireducens	Yes								2209738	2373	62.85	2254	119	3	1	1	0	1	0	1439	1655	661
61	Halobacterium hubeiense JI20-1	Finished	Genome sequence of Halobacterium hubeiense	University of Helsinki	2675903501	Euryarchaeota	Halobacteria	Halobacteriales	Halobacteriaceae	Halobacterium	Halobacterium hubeiense	Yes								3130345	3371	66.57	3309	62	3	1	1	0	1	0	1868	2205	795
62	Halobacterium jilantaiense CGMCC 1.5337	Permanent Draft	Genomic Encyclopedia of Type Strains, Phase III (KMG-III): the genomes of soil and plant-associated and newly described type strains	DOE Joint Genome Institute (JGI)	2617270915	Euryarchaeota	Halobacteria	Halobacteriales	Halobacteriaceae	Halobacterium	Halobacterium jilantaiense	Yes								2952792	3128	67.93	3077	51	3	1	1	0	1	0	1804	2117	762
63	Halobacterium salinarum NRC-1	Finished	Halobacterium sp. NRC-1	University of Massachusetts, University of Washington	638154504	Euryarchaeota	Halobacteria	Halobacteriales	Halobacteriaceae	Halobacterium	Halobacterium salinarum	Yes	Extreme, Saline water, Sea water				5.2-8	Halophile	Mesophile	2571010	2728	65.93	2675	53	4	1	1	0	1	0	1663	1861	727
64	Halobacterium sp. CBA1132	Permanent Draft	Genome sequencing of Halobacterium sp. CBA1132	Korea Basic Science Institute (KBSI)	2684622665	Euryarchaeota	Halobacteria	Halobacteriales	Halobacteriaceae	Halobacterium	Halobacterium sp. CBA1132	Yes								3012807	3258	65.95	3209	49	3	1	1	0	1	0	1839	2142	778
65	Halobacterium sp. DL1	Finished	Genome sequencing of novel haloarchaea from Deep Lake: an extremely cold and hypersaline Antarctic lake	DOE Joint Genome Institute (JGI)	2506783047	Euryarchaeota	Halobacteria	Halobacteriales	Halobacteriaceae	Halobacterium	Halobacterium sp. DL1	Yes	Fresh water					Halophile	Mesophile	3162560	3367	66.43	3317	50	3	1	1	0	1	0	1928	2255	834
66	Halobacterium sp. PCN9	Permanent Draft	Characterization of novel CO-oxidizing extreme halophiles	Louisiana State University	2816332101	Euryarchaeota	Halobacteria	Halobacteriales	Halobacteriaceae	Halobacterium	Halobacterium sp.	Yes	Salt	Bonneville Salt Flats, UT	40.7573	-113.886		Hypersaline		3511772	4003	66.75	3952	51	3	1	1	0	1	0	1949	2615	808
67	Halobaculum gomorrense DSM 9297	Permanent Draft	Genomic Encyclopedia of Archaeal and Bacterial Type Strains, Phase II (KMG-II): from individual species to whole genera	DOE Joint Genome Institute (JGI)	2695420988	Euryarchaeota	Halobacteria	Haloferacales	Halorubraceae	Halobaculum	Halobaculum gomorrense	Yes	Hypersaline	Dense bloom of red archaea at a depth of 4 m, Dead Sea, Israel, 1992	31.496	35.496		Halophile	Mesophile	3208246	3268	68.55	3216	52	5	1	3	0	1	0	1874	2234	810
68	Halobellus clavatus CGMCC 1.10118	Permanent Draft	Genomic Encyclopedia of Type Strains, Phase III (KMG-III): the genomes of soil and plant-associated and newly described type strains	DOE Joint Genome Institute (JGI)	2617270777	Euryarchaeota	Halobacteria	Haloferacales	Haloferacaceae	Halobellus	Halobellus clavatus	Yes								3754978	3742	64.11	3683	59	8	2	3	0	3	0	2087	2481	918
69	Halobellus limi CGMCC 1.10331	Permanent Draft	Genomic Encyclopedia of Type Strains, Phase III (KMG-III): the genomes of soil and plant-associated and newly described type strains	DOE Joint Genome Institute (JGI)	2619618869	Euryarchaeota	Halobacteria	Haloferacales	Haloferacaceae	Halobellus	Halobellus limi	Yes								3735964	3747	65.88	3693	54	5	2	3	0	0	0	2158	2599	949
70	Halobellus rufus CBA1103	Permanent Draft	Genome sequencing of Halobellus rufus CBA1103	Korea Basic Science Institute (KBSI)	2617271223	Euryarchaeota	Halobacteria	Haloferacales	Haloferacaceae	Halobellus	Halobellus rufus	Yes								3852219	4006	64.12	3936	70	3	1	1	0	1	0	2052	2600	980
71	Halobellus salinus DSM 18730	Permanent Draft	Genomic Encyclopedia of Archaeal and Bacterial Type Strains, Phase II (KMG-II): from individual species to whole genera	DOE Joint Genome Institute (JGI)	2724679816	Euryarchaeota	Halobacteria	Haloferacales	Haloferacaceae	Halobellus	Halobellus salinus	Yes		crystallizer pond at a marine solar saltern					Mesophile	3067455	3109	65.38	2984	125	3	1	1	0	1	0	1721	2042	778
72	Halobiforma haloterrestris DSM 13078	Permanent Draft	Genomic Encyclopedia of Archaeal and Bacterial Type Strains, Phase II (KMG-II): from individual species to whole genera	DOE Joint Genome Institute (JGI)	2693429869	Euryarchaeota	Halobacteria	Natrialbales	Natrialbaceae	Halobiforma	Halobiforma haloterrestris	Yes		hypersaline soil					Mesophile	4495442	4405	65.43	4335	70	7	4	1	0	2	0	2460	2973	974
73	Halobiforma lacisalsi AJ5, JCM 12983	Finished	Halobiforma lacisalsi AJ5, JCM 12983	Zhejiang University	2806310686	Euryarchaeota	Halobacteria	Natrialbales	Natrialbaceae	Halobiforma	Halobiforma lacisalsi	Yes	Fresh water	Ayakekumsalt lake in Xinjian China at an altitude of 3880m	43.796	87.627		Halophile	Mesophile	4381543	4432	65.27	4293	139	10	4	3	0	3	0	2391	2899	928
74	Halobiforma nitratireducens JCM 10879	Permanent Draft	Halobiforma nitratireducens JCM 10879	University of California, Davis	2554235466	Euryarchaeota	Halobacteria	Natrialbales	Natrialbaceae	Halobiforma	Halobiforma nitratireducens	Yes	Fresh water	Clay from Chahannao soda lake in Inner Mongolia, China	41.446	113.873	8.5	Halophile	Mesophile	3688747	3578	63.72	3535	43	3	2	0	0	1	0	1855	2334	829
75	Halococcus agarilyticus 197A	Permanent Draft	Halococcus agarilyticus 197A	Japan Agency for Marine-Earth Science and Technology	2600255127	Euryarchaeota	Halobacteria	Halobacteriales	Halococcaceae	Halococcus	Halococcus agarilyticus	Yes								3476609	3557	66.02	3440	117	3	1	1	0	1	0	2071	2443	905
76	Halococcus hamelinensis 100A6	Permanent Draft	Halococcus hamelinensis 100A6, JCM 12892	University of New South Wales	2502171174	Euryarchaeota	Halobacteria	Halobacteriales	Halococcaceae	Halococcus	Halococcus hamelinensis	Yes	Saline water	Stromalites of Shark Bay, Hamelin Pool, Western Australia	-26.4302	114.201		Halophile	Mesophile	3133046	3198	66.08	3150	48	3	1	1	0	1	0	1845	2202	837
77	Halococcus morrhuae DSM 1307	Permanent Draft	Halococcus morrhuae DSM 1307	University of California, Davis	2531839093	Euryarchaeota	Halobacteria	Halobacteriales	Halococcaceae	Halococcus	Halococcus morrhuae	Yes	Marine	Red Sea					Mesophile	2991556	3079	63.84	3035	44	2	1	0	0	1	0	1800	2199	819
78	Halococcus saccharolyticus DSM 5350	Permanent Draft	Haloarchaeal genomes	University of California, Davis	2554235495	Euryarchaeota	Halobacteria	Halobacteriales	Halococcaceae	Halococcus	Halococcus saccharolyticus	Yes		Ponds of saltern in San Fernando, C?idz, Spain	36.465	-6.196		Halophile	Mesophile	3449700	3489	64.03	3441	48	2	1	0	0	1	0	2023	2441	887
79	Halococcus salifodinae BIp	Permanent Draft	Haloarchaeal genomes	University of California, Davis	2554235506	Euryarchaeota	Halobacteria	Halobacteriales	Halococcaceae	Halococcus	Halococcus salifodinae	Yes		Salt mine near Bad Ischl, Austria	36.465	-6.196		Halophile	Mesophile	4199784	4127	63.45	4079	48	2	1	0	0	1	0	2249	2767	952
80	Halococcus sediminicola CBA1101	Permanent Draft	Genome sequencing of Halococcus sediminicola CBA1101	Korea Basic Science Institute (KBSI)	2630968663	Euryarchaeota	Halobacteria	Halobacteriales	Halococcaceae	Halococcus	Halococcus sediminicola	Yes								3764367	3963	62.29	3901	62	3	1	1	0	1	0	2199	2667	921
81	Halococcus thailandensis JCM 13552	Permanent Draft	Haloarchaeal genomes	University of California, Davis	2554235491	Euryarchaeota	Halobacteria	Halobacteriales	Halococcaceae	Halococcus	Halococcus thailandensis	Yes	Host	Fish sauce (nam-pla) fermentation in Thailand			43990	Halophile	Mesophile	4052434	4093	61.82	4032	61	5	0	2	0	3	0	2090	2637	902
82	Halodesulfurarchaeum formicicum HSR6	Finished	Halodesulfurarchaeum formicicum HSR6 Genome sequencing	Baltic Federal University	2718217700	Euryarchaeota	Halobacteria	Halobacteriales	Halobacteriaceae	Halodesulfurarchaeum	Halodesulfurarchaeum formicicum	Yes		Kulunda Steppe hypersaline lake	52.1718	79.4953				2085946	2190	63.62	2142	48	3	1	1	0	1	0	1404	1637	635
83	Haloferacaceae archaeon SYSU A9-0	Permanent Draft	Haloferacaceae archaeon SYSU A9-0 genome sequencing	Sun Yat-Sen University	2788499955	Euryarchaeota	Halobacteria	Haloferacales	Haloferacaceae	Halegenticoccus	Halegenticoccus soli	Yes		salt lake						4614977	4621	66.87	4561	60	8	2	3	0	3	0	2660	3226	1064
84	Haloferax alexandrinus JCM 10717	Permanent Draft	Haloarchaeal genomes	University of California, Davis	2554235481	Euryarchaeota	Halobacteria	Haloferacales	Haloferacaceae	Haloferax	Haloferax alexandrinus	Yes		Solar saltern in Alexandria, Egypt	31.2135	29.9443		Halophile	Mesophile	3649262	3684	66.3	3623	61	6	1	0	0	5	0	2179	2582	943
85	Haloferax denitrificans S1	Permanent Draft	Haloferax denitrificans S1, ATCC 35960	San Diego State University	2508501014	Euryarchaeota	Halobacteria	Haloferacales	Haloferacaceae	Haloferax	Haloferax denitrificans	Yes	Fresh water	Saltern, California				Halophile	Mesophile	3848468	3867	66.27	3809	58	3	1	1	0	1	0	2297	2720	990
86	Haloferax elongans ATCC BAA-1513	Permanent Draft	Haloarchaeal genomes	University of California, Davis	2554235478	Euryarchaeota	Halobacteria	Haloferacales	Haloferacaceae	Haloferax	Haloferax elongans	Yes		Smooth mat from Hamelin pool, Shark Bay Australia	-26.421	114.278		Halophile	Mesophile	3952136	3903	61.15	3848	55	3	1	1	0	1	0	2155	2657	903
87	Haloferax gibbonsii ATCC 33959	Permanent Draft	Haloarchaeal genomes	University of California, Davis	2554235501	Euryarchaeota	Halobacteria	Haloferacales	Haloferacaceae	Haloferax	Haloferax gibbonsii	Yes		Solar saltern, Alicante, Spain	38.345	-0.481		Halophile	Mesophile	4057322	4003	65.85	3945	58	4	2	0	0	2	0	2307	2764	953
88	Haloferax larsenii JCM 13917	Permanent Draft	Haloarchaeal genomes	University of California, Davis	2554235500	Euryarchaeota	Halobacteria	Haloferacales	Haloferacaceae	Haloferax	Haloferax larsenii	Yes		Solar saltern in Zhe-Jiang Province, China	30.46	120.166	6.5-7	Halophile	Mesophile	3697948	3684	62.04	3630	54	3	1	0	0	2	0	2103	2547	896
89	Haloferax lucentense DSM 14919	Permanent Draft	Haloarchaeal genomes	University of California, Davis	2554235494	Euryarchaeota	Halobacteria	Haloferacales	Haloferacaceae	Haloferax	Haloferax lucentense	Yes		Saltern in Alicante, Spain	38.345	-0.481		Halophile	Mesophile	3619064	3689	66.39	3632	57	4	1	0	0	3	0	2173	2569	941
90	Haloferax massiliensis Arc-Hr	Permanent Draft	Cuture of halophilic archaea and bacteria from human gut - URMITE	Aix-Marseille University	2681813044	Euryarchaeota	Halobacteria	Haloferacales	Haloferacaceae	Haloferax	Haloferax massiliensis	Yes								4015175	4128	66.34	3932	196	3	1	1	0	1	0	2370	2805	993
91	Haloferax mediterranei R-4	Finished	Haloferax mediterranei ATCC 33500	University of Alicante	2576861458	Euryarchaeota	Halobacteria	Haloferacales	Haloferacaceae	Haloferax	Haloferax mediterranei	Yes	Fresh water	salt ponds, Alicante, Spain	38.3452	-0.481006		Halophile	Mesophile	3906699	3650	60.26	3592	58	4	2	1	0	1	0	2108	2514	883
92	Haloferax mucosum PA12	Permanent Draft	Haloferax mucosum PA12, ATCC BAA-1512	San Diego State University	2508501020	Euryarchaeota	Halobacteria	Haloferacales	Haloferacaceae	Haloferax	Haloferax mucosum	Yes	Fresh water	Pastular mat from Hamelin pool, Shark Bay Australia	-26.4064	114.278		Halophile	Mesophile	3371699	3516	61.84	3455	61	3	1	1	0	1	0	1964	2305	841
93	Haloferax namakaokahaiae Mke2.3	Permanent Draft	Characterization of novel CO-oxidizing extreme halophiles	Michigan State University	2756170193	Euryarchaeota	Halobacteria	Haloferacales	Haloferacaceae	Haloferax	Haloferax namakaokahaiae	Yes		South shore of Hawai`i Island	19.4394	-155.862			Mesophile	3567354	3733	61.72	3670	63	5	3	1	0	1	0	2142	2528	899
94	Haloferax prahovense TL6	Permanent Draft	Haloarchaeal genomes	University of California, Davis	2554235499	Euryarchaeota	Halobacteria	Haloferacales	Haloferacaceae	Haloferax	Haloferax prahovense	Yes	Saline water	isolated from a surface water sample from Telega Lake, a saline continental lake	45.112	25.793	7-7.5	Halophile	Mesophile	3998799	3967	65.69	3913	54	5	1	0	0	4	0	2274	2739	928
95	Haloferax sp. BAB2207	Permanent Draft	Haloferax sp. BAB2207	Gujarat Genomics Initiative	2537561593	Euryarchaeota	Halobacteria	Haloferacales	Haloferacaceae	Haloferax	Haloferax sp. BAB2207	Yes								3744707	4134	65.79	4084	50	4	1	0	0	3	0	1867	2626	1041
96	Haloferax sp. Caatinga	Permanent Draft	Draft genome of Haloferax sp. isolated from Caatinga Brazilian desert	Federal University of Para	2585428003	Euryarchaeota	Halobacteria	Haloferacales	Haloferacaceae	Haloferax	Haloferax sp. ATB1	Yes								4223705	4416	61.79	4323	93	5	2	1	0	2	0	1875	2583	814
97	Haloferax sp. GUBF-1, ATCC BAA-644	Permanent Draft	Haloferax sp. ATCC BAA-644	University of California, Davis	2537561867	Euryarchaeota	Halobacteria	Haloferacales	Haloferacaceae	Haloferax	Haloferax sp. ATCC BAA-644	Yes		estuary (natural salt pan, Mandon estuary, Goa) Goa India	15.425	73.983		Halophile	Mesophile	3587033	3601	66.66	3545	56	5	1	0	0	4	0	2175	2559	925
98	Haloferax sp. GUBF-2, ATCC BAA-645	Permanent Draft	Haloferax sp. ATCC BAA-645	University of California, Davis	2537561868	Euryarchaeota	Halobacteria	Haloferacales	Haloferacaceae	Haloferax	Haloferax sp. ATCC BAA-645	Yes		Estuary (natural solar salt pan, Mandon estuary, Goa) Goa India	15.425	73.983		Halophile	Mesophile	3598205	3612	66.65	3558	54	3	0	1	0	2	0	2201	2578	933
99	Haloferax sp. GUBF-3	Permanent Draft	Haloferax sp. ATCC BAA-646	University of California, Davis	2537561864	Euryarchaeota	Halobacteria	Haloferacales	Haloferacaceae	Haloferax	Haloferax sp. ATCC BAA-646	Yes		estuary (natural solar salt pan, Mandon estuary, Goa) Goa India	15.425	73.983		Halophile	Mesophile	3609529	3626	66.63	3569	57	7	1	2	0	4	0	2190	2571	930
100	Haloferax sp. Q22	Permanent Draft	Haloferax sp. Q22 Genome sequencing and assembly	Institute of Microbiology, Chinese Academy of Sciences	2681813380	Euryarchaeota	Halobacteria	Haloferacales	Haloferacaceae	Haloferax	Haloferax sp. Q22	Yes		salt mine						3977555	4089	65.06	4024	65	5	1	2	0	2	0	2282	2717	928
101	Haloferax sp. SB29	Permanent Draft	Haloferax sp. SB29 genome sequencing	King Abdulah University of Science and Technology, Red Sea Research Center, Saudi Arabia	2690315685	Euryarchaeota	Halobacteria	Haloferacales	Haloferacaceae	Haloferax	Haloferax sp. SB29	Yes		brine-seawater interface						3697243	4081	61.07	4023	58	4	1	1	0	2	0	2076	2682	941
102	Haloferax sp. SB3	Permanent Draft	Haloferax sp. SB3 genome sequencing	King Abdulah University of Science and Technology, Red Sea Research Center, Saudi Arabia	2690315684	Euryarchaeota	Halobacteria	Haloferacales	Haloferacaceae	Haloferax	Haloferax sp. SB3	Yes		brine-seawater interface						3895853	3962	65.67	3903	59	4	1	1	0	2	0	2252	2701	928
103	Haloferax sulfurifontis M6	Permanent Draft	Haloferax sulfurifontis M6, ATCC BAA-897	San Diego State University	2508501015	Euryarchaeota	Halobacteria	Haloferacales	Haloferacaceae	Haloferax	Haloferax sulfurifontis	Yes	Fresh water	Microbial mats in a sulfur spring; USA, Oklahoma				Halophile	Mesophile	3816558	3915	66.3	3856	59	3	1	1	0	1	0	2199	2646	937
104	Haloferax volcanii DS2, ATCC 29605	Finished	Haloferax volcanii DS2, ATCC 29605	J. Craig Venter Institute (JCVI)	646564536	Euryarchaeota	Halobacteria	Haloferacales	Haloferacaceae	Haloferax	Haloferax volcanii	Yes	Hypersaline	Shore mud, Dead Sea	31.5007	35.491		Halophile	Mesophile	4012900	4064	65.48	4015	49	6	2	2	0	2	0	2303	2748	980
105	Halogeometricum borinquense PR3, DSM 11551	Finished	A Genomic Encyclopedia of Bacteria and Archaea (GEBA)	DOE Joint Genome Institute (JGI)	649633053	Euryarchaeota	Halobacteria	Haloferacales	Haloferacaceae	Halogeometricum	Halogeometricum borinquense	Yes	Solar saltern	Solar salterns of Cabo Rojo Puerto Rico	18.0882	-67.1471		Halophile	Mesophile	3944467	3993	59.94	3936	57	6	2	2	0	2	0	2175	2666	913
106	Halogeometricum limi CGMCC 1.8711	Permanent Draft	Genomic Encyclopedia of Type Strains, Phase III (KMG-III): the genomes of soil and plant-associated and newly described type strains	DOE Joint Genome Institute (JGI)	2617270895	Euryarchaeota	Halobacteria	Haloferacales	Haloferacaceae	Halogeometricum	Halogeometricum limi	Yes								3616269	3685	65.85	3626	59	5	2	2	0	1	0	2140	2577	907
107	Halogeometricum pallidum JCM 14848	Permanent Draft	Haloarchaeal genomes	University of California, Davis	2554235507	Euryarchaeota	Halobacteria	Haloferacales	Haloferacaceae	Halogeometricum	Halogeometricum pallidum	Yes		Zodletone Spring, a sulfide- and sulfur-rich spring in south-western Oklahoma, USA			6.5	Halophile	Mesophile	4384515	4296	65.65	4246	50	2	1	0	0	1	0	2436	2965	1037
108	Halogeometricum rufum CGMCC 1.7736	Permanent Draft	Genomic Encyclopedia of Type Strains, Phase III (KMG-III): the genomes of soil and plant-associated and newly described type strains	DOE Joint Genome Institute (JGI)	2617270920	Euryarchaeota	Halobacteria	Haloferacales	Haloferacaceae	Halogeometricum	Halogeometricum rufum	Yes								4187125	4256	67.65	4197	59	4	2	0	0	2	0	2385	2912	950
109	Halogranum amylolyticum CGMCC 1.10121	Permanent Draft	Genomic Encyclopedia of Type Strains, Phase III (KMG-III): the genomes of soil and plant-associated and newly described type strains	DOE Joint Genome Institute (JGI)	2617270928	Euryarchaeota	Halobacteria	Haloferacales	Haloferacaceae	Halogranum	Halogranum amylolyticum	Yes								5185690	5357	62.92	5265	92	5	3	2	0	0	0	2827	3491	1137
110	Halogranum gelatinilyticum CGMCC 1.10119	Permanent Draft	Genomic Encyclopedia of Type Strains, Phase III (KMG-III): the genomes of soil and plant-associated and newly described type strains	DOE Joint Genome Institute (JGI)	2617270902	Euryarchaeota	Halobacteria	Haloferacales	Haloferacaceae	Halogranum	Halogranum gelatinilyticum	Yes								3770187	3856	65.14	3794	62	6	3	1	0	2	0	2202	2597	892
111	Halogranum rubrum CGMCC 1.7738	Permanent Draft	Genomic Encyclopedia of Type Strains, Phase III (KMG-III): the genomes of soil and plant-associated and newly described type strains	DOE Joint Genome Institute (JGI)	2619618990	Euryarchaeota	Halobacteria	Haloferacales	Haloferacaceae	Halogranum	Halogranum rubrum	Yes								4566676	4656	62.2	4581	75	6	3	1	0	2	0	2564	3068	1014
112	Halogranum salarium B-1	Permanent Draft	Halogranum salarium B-1	Korea Research Institute of Bioscience and Biotechnology	2537561866	Euryarchaeota	Halobacteria	Haloferacales	Haloferacaceae	Halogranum	Halogranum salarium	Yes	Salt	Evaporitic salt crystal, seashore of Namhae					Mesophile	4492306	4890	62.2	4824	66	3	1	1	0	1	0	2489	2992	1006
113	Halohasta litchfieldiae DSM 22187	Permanent Draft	Genomic Encyclopedia of Archaeal and Bacterial Type Strains, Phase II (KMG-II): from individual species to whole genera	DOE Joint Genome Institute (JGI)	2693429898	Euryarchaeota	Halobacteria	Haloferacales	Halorubraceae	Halohasta	Halohasta litchfieldiae	Yes		surface water					Mesophile	3284590	3489	58.8	3434	55	3	1	1	0	1	0	1861	2279	831
114	Halolamina pelagica CGMCC 1.10329	Permanent Draft	Genomic Encyclopedia of Type Strains, Phase III (KMG-III): the genomes of soil and plant-associated and newly described type strains	DOE Joint Genome Institute (JGI)	2663762745	Euryarchaeota	Halobacteria	Haloferacales	Halorubraceae	Halolamina	Halolamina pelagica	Yes								3160633	3273	67.09	3218	55	4	2	1	0	1	0	1827	2179	745
115	Halolamina rubra CBA1107	Permanent Draft	Genome sequencing of Halolamina rubra CBA1107	Korea Basic Science Institute (KBSI)	2617271222	Euryarchaeota	Halobacteria	Haloferacales	Halorubraceae	Halolamina	Halolamina rubra	Yes								2955001	3155	69.05	3102	53	4	2	1	0	1	0	1726	2175	794
116	Halolamina sediminis halo7	Permanent Draft	Complete genome analysis for Halolamina sediminis strain halo7 isolated from solar saltern	Jeju National University	2695420318	Euryarchaeota	Halobacteria	Haloferacales	Halorubraceae	Halolamina	Halolamina sediminis	Yes		solar saltern						2835858	2938	67.94	2885	53	6	2	2	0	2	0	1746	2057	728
117	Halomicrobium katesii DSM 19301	Permanent Draft	Continuation of the Genomic Encyclopedia of Bacteria and Archaea pilot project (GEBA)	DOE Joint Genome Institute (JGI)	2516653073	Euryarchaeota	Halobacteria	Halobacteriales	Haloarculaceae	Halomicrobium	Halomicrobium katesii	Yes	Saline water	Lake Tebenquiche, Atacama saltern, Chile	-27.566	-70.05			Mesophile	3607771	3876	65.03	3680	196	12	4	4	0	4	0	1980	2453	835
118	Halomicrobium mukohataei arg-2, DSM 12286	Finished	A Genomic Encyclopedia of Bacteria and Archaea (GEBA)	DOE Joint Genome Institute (JGI)	644736372	Euryarchaeota	Halobacteria	Halobacteriales	Haloarculaceae	Halomicrobium	Halomicrobium mukohataei	Yes	Soil	Salinas grandes from Andes highlands in Jujuy Argentina	-22.663	-66.236		Halophile	Mesophile	3332349	3475	65.53	3415	60	12	6	3	0	3	0	1875	2287	826
119	Halomicrobium zhouii CGMCC 1.10457	Permanent Draft	Genomic Encyclopedia of Type Strains, Phase III (KMG-III): the genomes of soil and plant-associated and newly described type strains	DOE Joint Genome Institute (JGI)	2667527389	Euryarchaeota	Halobacteria	Halobacteriales	Haloarculaceae	Halomicrobium	Halomicrobium zhouii	Yes								4250330	4218	66.22	4150	68	6	2	2	0	2	0	2234	2746	880
120	Haloparvum sedimenti DYS4	Permanent Draft	Haloparvum sp.DYS4 genome sequencing	Institute of Microbiology, Chinese Academy of Sciences	2681813379	Euryarchaeota	Halobacteria	Haloferacales	Halorubraceae	Haloparvum	Haloparvum sedimenti	Yes		salt mine						3243052	3536	68.27	3326	210	7	1	2	0	4	0	1772	2186	831
121	Halopelagius inordinatus CGMCC 1.7739	Permanent Draft	Genomic Encyclopedia of Type Strains, Phase III (KMG-III): the genomes of soil and plant-associated and newly described type strains	DOE Joint Genome Institute (JGI)	2617270917	Euryarchaeota	Halobacteria	Haloferacales	Haloferacaceae	Halopelagius	Halopelagius inordinatus	Yes								3529311	3666	65.02	3608	58	6	2	2	0	2	0	2116	2506	888
122	Halopelagius longus CGMCC 1.12397	Permanent Draft	Genomic Encyclopedia of Type Strains, Phase III (KMG-III): the genomes of soil and plant-associated and newly described type strains	DOE Joint Genome Institute (JGI)	2671180169	Euryarchaeota	Halobacteria	Haloferacales	Haloferacaceae	Halopelagius	Halopelagius longus	Yes								3871751	3894	65.72	3838	56	7	2	3	0	2	0	2277	2674	939
123	Halopenitus malekzadehii IBRC-M10418	Permanent Draft	Genomic Encyclopedia of Archaeal and Bacterial Type Strains, Phase II (KMG-II): from individual species to whole genera	DOE Joint Genome Institute (JGI)	2651870118	Euryarchaeota	Halobacteria	Haloferacales	Halorubraceae	Halopenitus	Halopenitus malekzadehii	Yes								3136824	3202	64.48	3127	75	6	2	1	0	3	0	1792	2146	809
124	Halopenitus persicus CBA1233	Finished	Halopenitus persicus CBA1233 genome sequencing	Korea Basic Science Institute (KBSI)	2802429334	Euryarchaeota	Halobacteria	Haloferacales	Halorubraceae	Halopenitus	Halopenitus persicus	Yes			36.5875	126.374				3105937	3128	65.97	3056	72	6	2	2	0	2	0	1850	2166	830
125	Halopiger aswanensis DSM 13151	Permanent Draft	Genomic Encyclopedia of Archaeal and Bacterial Type Strains, Phase II (KMG-II): from individual species to whole genera	DOE Joint Genome Institute (JGI)	2636416066	Euryarchaeota	Halobacteria	Natrialbales	Natrialbaceae	Halopiger	Halopiger aswanensis	Yes	Soil	surface of hypersaline salt soil					Mesophile	4865231	4783	64.36	4731	52	4	4	0	0	0	0	2649	3216	1027
126	Halopiger djelfamassiliensis IIH2	Permanent Draft	Archaeal diversity in hypersaline Lakes of Algeria	European Bioinformatics Institute	2602041563	Euryarchaeota	Halobacteria	Natrialbales	Natrialbaceae	Halopiger	Halopiger djelfimassiliensis	Yes		evaporitic sediment of the hypersaline Lake Zahrez Gharbi in the Djelfa region (Algeria)	34.9167	2.83333				3755243	3776	64.31	3715	61	4	2	1	0	1	0	2100	2518	905
127	Halopiger goleamassiliensis IIH3	Permanent Draft	Halopiger sp. IIH3	European Bioinformatics Institute	2602041564	Euryarchaeota	Halobacteria	Natrialbales	Natrialbaceae	Halopiger	Halopiger goleimassiliensis	Yes		evaporitic sediment in El Golea Lake, Ghardaia region (Algeria)						3906156	3905	66.06	3823	82	7	3	1	0	3	0	2169	2626	924
128	Halopiger salifodinae CGMCC 1.12284	Permanent Draft	Genomic Encyclopedia of Type Strains, Phase III (KMG-III): the genomes of soil and plant-associated and newly described type strains	DOE Joint Genome Institute (JGI)	2671180170	Euryarchaeota	Halobacteria	Natrialbales	Natrialbaceae	Halopiger	Halopiger salifodinae	Yes								4272165	4209	65.45	4146	63	9	4	3	0	2	0	2390	2836	981
129	Halopiger xanaduensis SH-6	Finished	Completing the genomic survey of haloarchaeal genomes (revised), part 1	DOE Joint Genome Institute (JGI)	2506520034	Euryarchaeota	Halobacteria	Natrialbales	Natrialbaceae	Halopiger	Halopiger xanaduensis	Yes	Sediment	Sediment of saline Lake Shangmatala in Inner Mongolia, China	43.2	114.016	7.5-8	Halophile	Mesophile	4355268	4281	65.18	4221	60	10	4	3	0	3	0	2382	2866	953
130	Haloplanus aerogenes CGMCC 1.10124	Permanent Draft	Genomic Encyclopedia of Type Strains, Phase III (KMG-III): the genomes of soil and plant-associated and newly described type strains	DOE Joint Genome Institute (JGI)	2619618938	Euryarchaeota	Halobacteria	Haloferacales	Haloferacaceae	Haloplanus	Haloplanus aerogenes	Yes		sediment of marine solar saltern	34.7272	119.297	43991	Halophile		3507307	3702	65.68	3634	68	10	3	4	0	3	0	2047	2467	833
131	Haloplanus natans DSM 17983	Permanent Draft	Continuation of the Genomic Encyclopedia of Bacteria and Archaea pilot project (GEBA)	DOE Joint Genome Institute (JGI)	2517287030	Euryarchaeota	Halobacteria	Haloferacales	Haloferacaceae	Haloplanus	Haloplanus natans	Yes	Hypersaline	Experimental mesocosm filled with a mixture of water from the Dead Sea and the Red Sea; Israel, Sedom.	31.1	35.3833	7	Halophile	Mesophile	3797935	4173	65.01	3994	179	4	1	2	0	1	0	2025	2529	830
132	Haloplanus vescus CGMCC 1.8712	Permanent Draft	Genomic Encyclopedia of Type Strains, Phase III (KMG-III): the genomes of soil and plant-associated and newly described type strains	DOE Joint Genome Institute (JGI)	2617270898	Euryarchaeota	Halobacteria	Haloferacales	Haloferacaceae	Haloplanus	Haloplanus vescus	Yes								2776859	3024	65.11	2897	127	8	2	3	0	3	0	1692	1975	730
133	Haloprofundus marisrubri SB9	Permanent Draft	Haloprofundus marisrubri SB9 genome sequencing	King Abdulah University of Science and Technology, Red Sea Research Center, Saudi Arabia	2690315683	Euryarchaeota	Halobacteria	Haloferacales	Haloferacaceae	Haloprofundus	Haloprofundus marisrubri	Yes		brine-seawater interface						3924651	4083	62.54	4019	64	6	1	3	0	2	0	2269	2713	891
134	Haloprofundus sp. MHR1	Finished	Whole genome sequencing of Haloprofundus sp. MHR1	Nankai University	2828886851	Euryarchaeota	Halobacteria	Haloferacales	Haloferacaceae	Haloprofundus	Haloprofundus sp. MHR1	Yes		Freshwater river sediment	39.1315	117.202				3051700	3193	65.63	3131	62	6	2	2	0	2	0	2243	2145	746
135	Haloquadratum walsbyi HBSQ001, DSM 16790	Finished	Haloquadratum walsbyi HBSQ001, DSM 16790	Max Planck Institute	637000129	Euryarchaeota	Halobacteria	Haloferacales	Haloferacaceae	Haloquadratum	Haloquadratum walsbyi	Yes	Ponds	39% total salinity crystallizer pond; Spain, Brac del Port, Alicante	38.345	-0.481		Halophile	Mesophile	3179361	2914	47.86	2861	53	6	2	2	0	2	0	1512	1904	775
136	Halorhabdus rudnickae USBA 945	Permanent Draft	Colombia BIO	Universidad de los Andes	2870879507	Euryarchaeota	Halobacteria	Halobacteriales	Haloarculaceae	Halorhabdus	Halorhabdus rudnickae	Yes		Zipaquir? salt mine	5.01838	-74.0038				3656801	3849	61.78	3792	56	3	1	1	0	1	0	2620	2452	828
137	Halorhabdus tiamatea SARL4B	Permanent Draft	Halorhabdus tiamatea SARL4B	King Abdullah University of Science and Technology	2562617191	Euryarchaeota	Halobacteria	Halobacteriales	Haloarculaceae	Halorhabdus	Halorhabdus tiamatea	Yes	Marine	Brine-sediment interface of the Shaban Deep; Saudi Arabia, Red Sea	27.566	48.951			Thermophile	3146564	3325	62.51	3282	43	3	1	1	0	1	0	1668	2087	710
138	Halorhabdus utahensis AX-2, DSM 12940	Finished	A Genomic Encyclopedia of Bacteria and Archaea (GEBA)	DOE Joint Genome Institute (JGI)	644736373	Euryarchaeota	Halobacteria	Halobacteriales	Haloarculaceae	Halorhabdus	Halorhabdus utahensis	Yes	Sediment	Sediment of Great Salt Lake, Utah, USA	41.1773	-112.502	5.5-8.5	Halophile	Mesophile	3116795	3076	62.9	3027	49	4	2	1	0	1	0	1685	2123	746
139	Halorientalis persicus IBRC-M 10043	Permanent Draft	Genomic Encyclopedia of Archaeal and Bacterial Type Strains, Phase II (KMG-II): from individual species to whole genera	DOE Joint Genome Institute (JGI)	2654588107	Euryarchaeota	Halobacteria	Halobacteriales	Haloarculaceae	Halorientalis	Halorientalis persicus	Yes								4869758	5238	63.46	5153	85	8	2	2	0	4	0	2338	2966	905
140	Halorientalis regularis IBRC-M 10760	Permanent Draft	Genomic Encyclopedia of Archaeal and Bacterial Type Strains, Phase II (KMG-II): from individual species to whole genera	DOE Joint Genome Institute (JGI)	2651870125	Euryarchaeota	Halobacteria	Halobacteriales	Haloarculaceae	Halorientalis	Halorientalis regularis	Yes								4032197	4288	65.02	4214	74	8	2	2	0	4	0	2144	2710	923
141	Halorientalis sp. IM1011	Finished	Halorientalis sp. IM1011 Genome sequencing	Institute of Microbiology, Chinese Academy of Sciences	2740891998	Euryarchaeota	Halobacteria	Halobacteriales	Haloarculaceae	Halorientalis	Halorientalis sp. IM1011	Yes		saltern						3778989	4038	65.58	3955	83	6	2	2	0	2	0	2098	2544	854
142	Halorubrum aethiopicum SAH-A6	Permanent Draft	Halorubrum aethiopicum SAH-A6 Genome sequencing	Silla university	2684622567	Euryarchaeota	Halobacteria	Haloferacales	Halorubraceae	Halorubrum	Halorubrum aethiopicum	Yes		rock salt obtained from Danakil depression in Ethiopia						3325770	3310	67.97	3255	55	6	2	2	0	2	0	1867	2252	834
143	Halorubrum aidingense JCM 13560	Permanent Draft	Haloarchaeal genomes	University of California, Davis	2554235475	Euryarchaeota	Halobacteria	Haloferacales	Halorubraceae	Halorubrum	Halorubrum aidingense	Yes	Fresh water	Aibi salt lake in Xin-Jiang, China	43.793	87.627	7	Halophile	Mesophile	3108525	3034	67.19	2981	53	4	1	2	0	1	0	1790	2135	812
144	Halorubrum aquaticum CGMCC 1.6377	Permanent Draft	Genomic Encyclopedia of Type Strains, Phase III (KMG-III): the genomes of soil and plant-associated and newly described type strains	DOE Joint Genome Institute (JGI)	2617270873	Euryarchaeota	Halobacteria	Haloferacales	Halorubraceae	Halorubrum	Halorubrum aquaticum	Yes								3184102	3172	67.4	3116	56	6	3	1	0	2	0	1841	2199	819
145	Halorubrum arcis AJ201	Permanent Draft	Haloarchaeal genomes	University of California, Davis	2554235480	Euryarchaeota	Halobacteria	Haloferacales	Halorubraceae	Halorubrum	Halorubrum arcis	Yes	Fresh water	Ayakekum salt lake on the Qinghai-Tibet Plateau	33	92	7.5	Halophile	Mesophile	3382601	3302	67.34	3247	55	7	0	1	0	6	0	1852	2228	803
146	Halorubrum californiense SF3-213	Permanent Draft	Haloarchaeal genomes	University of California, Davis	2554235496	Euryarchaeota	Halobacteria	Haloferacales	Halorubraceae	Halorubrum	Halorubrum californiense	Yes	Ponds	Crystallizer pond at the Cargill Solar Salt Plant, Newark, California, USA	37.521	-122.029	7.3	Halophile	Mesophile	3682872	3501	66.19	3456	45	2	1	0	0	1	0	1868	2327	807
147	Halorubrum chaoviator DSM 19316	Permanent Draft	Genomic Encyclopedia of Archaeal and Bacterial Type Strains, Phase II (KMG-II): from individual species to whole genera	DOE Joint Genome Institute (JGI)	2724679704	Euryarchaeota	Halobacteria	Haloferacales	Halorubraceae	Halorubrum	Halorubrum chaoviator	Yes		salt concentration pond, evaporitic salt crystal					Mesophile	3666854	3698	66.42	3625	73	5	3	1	0	1	0	2011	2417	833
148	Halorubrum cibi DSM 19504	Permanent Draft	Genomic Encyclopedia of Archaeal and Bacterial Type Strains, Phase II (KMG-II): from individual species to whole genera	DOE Joint Genome Institute (JGI)	2724679794	Euryarchaeota	Halobacteria	Haloferacales	Halorubraceae	Halorubrum	Halorubrum cibi	Yes		shrimp jeotgal, a traditional Korean salt-fermented food					Mesophile	3176020	3166	66.82	3114	52	3	1	1	0	1	0	1864	2187	794
149	Halorubrum coriense ACM 3911, Ch2	Permanent Draft	Haloarchaeal genomes	University of California, Davis	2554235473	Euryarchaeota	Halobacteria	Haloferacales	Halorubraceae	Halorubrum	Halorubrum coriense	Yes		Marine solar saltern in Geelong, Australia	-38.147	144.36	7.3	Halophile	Mesophile	3645313	3514	66.99	3463	51	3	2	0	0	1	0	1927	2389	840
150	Halorubrum distributum VKM B-1733, 1-M	Permanent Draft	Haloarchaeal genomes	University of California, Davis	2554235487	Euryarchaeota	Halobacteria	Haloferacales	Halorubraceae	Halorubrum	Halorubrum distributum	Yes	Soil	sulfate saline soil crust in Turkmen, USSR				Halophile	Mesophile	3307369	3182	68.08	3133	49	5	2	0	0	3	0	1842	2212	795
151	Halorubrum ezzemoulense DSM 17463	Permanent Draft	Genomic Encyclopedia of Type Strains, Phase I: the one thousand microbial genomes (KMG-I) project	DOE Joint Genome Institute (JGI)	2524614679	Euryarchaeota	Halobacteria	Haloferacales	Halorubraceae	Halorubrum	Halorubrum ezzemoulense	Yes	Saline water	water sample			7-7.5	Halophile	Thermotolerant	3593334	3661	66.6	3553	108	6	2	3	0	1	0	1949	2399	846
152	Halorubrum halodurans Cb34	Permanent Draft	Halorubrum	University of Connecticut	2791355071	Euryarchaeota	Halobacteria	Haloferacales	Halorubraceae	Halorubrum	Halorubrum halodurans	Yes		endorheic salt-lake						3311967	3406	67.65	3345	61	3	1	1	0	1	0	1785	2199	760
153	Halorubrum halophilum B8	Permanent Draft	Genome sequencing of Halorubrum halophilum B8	Korea Basic Science Institute (KBSI)	2617271215	Euryarchaeota	Halobacteria	Haloferacales	Halorubraceae	Halorubrum	Halorubrum halophilum	Yes								3677984	3701	65.14	3624	77	8	1	4	0	3	0	2007	2455	872
154	Halorubrum hochstenium 1-13-28	Permanent Draft	Haloarchaeal genomes	University of California, Davis	2554235503	Euryarchaeota	Halobacteria	Haloferacales	Halorubraceae	Halorubrum	Halorubrum hochstenium	Yes		Salt mine, Jefferson Island, LA, 1987				Halophile	Mesophile	3037532	2980	69.13	2931	49	5	1	0	0	4	0	1748	2036	764
155	Halorubrum kocurii JCM 14978	Permanent Draft	Haloarchaeal genomes	University of California, Davis	2554235489	Euryarchaeota	Halobacteria	Haloferacales	Halorubraceae	Halorubrum	Halorubrum kocurii	Yes	Fresh water	Saline Lake Bagaejinnor in Inner Mongolia, China			7.5	Halophile	Mesophile	3619738	3480	66.86	3433	47	1	0	0	0	1	0	1973	2422	863
156	Halorubrum lacusprofundi ATCC 49239	Finished	Diverse archaeal organisms	DOE Joint Genome Institute (JGI)	643692025	Euryarchaeota	Halobacteria	Haloferacales	Halorubraceae	Halorubrum	Halorubrum lacusprofundi	Yes	Fresh water	Deep Lake, Antarctica	-68.3481	78.0432		Halophile	Psychrophile	3692576	3725	63.97	3665	60	9	3	3	0	3	0	1948	2381	827
157	Halorubrum lipolyticum DSM 21995	Permanent Draft	Halorubrum lipolyticum DSM 21995	University of California, Davis	2534682115	Euryarchaeota	Halobacteria	Haloferacales	Halorubraceae	Halorubrum	Halorubrum lipolyticum	Yes	Host	Human feces	45.545	-73.639		Halophile	Mesophile	3425042	3267	68.01	3220	47	3	2	0	0	1	0	1898	2290	852
158	Halorubrum litoreum JCM 13561	Permanent Draft	Haloarchaeal genomes	University of California, Davis	2554235508	Euryarchaeota	Halobacteria	Haloferacales	Halorubraceae	Halorubrum	Halorubrum litoreum	Yes		Marine solar saltern in Fujian, China	26.101	119.295	7-7.5	Halophile	Mesophile	3137757	3065	68.9	3014	51	5	1	2	0	2	0	1787	2105	804
159	Halorubrum persicum C49	Permanent Draft	Halorubrum	University of Connecticut	2791355074	Euryarchaeota	Halobacteria	Haloferacales	Halorubraceae	Halorubrum	Halorubrum persicum	Yes		endorheic salt-lake						3569702	3617	65.89	3558	59	3	1	1	0	1	0	1918	2331	837
160	Halorubrum saccharovorum M6	Permanent Draft	Haloarchaeal genomes	University of California, Davis	2524614823	Euryarchaeota	Halobacteria	Haloferacales	Halorubraceae	Halorubrum	Halorubrum saccharovorum	Yes		Saltern in the San Francisco Bay area				Halophile	Mesophile	3423703	3278	66.89	3232	46	2	1	0	0	1	0	1815	2201	816
161	Halorubrum sodomense RD 26	Permanent Draft	Genomic Encyclopedia of Archaeal and Bacterial Type Strains, Phase II (KMG-II): from individual species to whole genera	DOE Joint Genome Institute (JGI)	2617270732	Euryarchaeota	Halobacteria	Haloferacales	Halorubraceae	Halorubrum	Halorubrum sodomense	Yes	Marine	Surface water from the Dead Sea	31.4486	35.4035		Halophile	Mesophile	3030553	3084	69.02	3024	60	8	2	2	0	4	0	1775	2097	795
162	Halorubrum sp. BV1	Permanent Draft	Genomic analysis of novel thermophilic aerobic CO-oxidizing bacteria derived from a unique biofilm community	DOE Joint Genome Institute (JGI)	2579779171	Euryarchaeota	Halobacteria	Haloferacales	Halorubraceae	Halorubrum	Halorubrum sp. BV1	Yes		salt crust						2767463	2811	66.01	2742	69	7	2	3	0	2	0	1623	1903	751
163	Halorubrum sp. C191	Permanent Draft	Halorubrum	University of Connecticut	2788500553	Euryarchaeota	Halobacteria	Haloferacales	Halorubraceae	Halorubrum	Halorubrum sp. C191	Yes		endorheic salt-lake						3839515	3938	66.1	3874	64	1	1	0	0	0	0	2046	2539	839
164	Halorubrum sp. Ea1	Permanent Draft	Halorubrum	University of Connecticut	2791355075	Euryarchaeota	Halobacteria	Haloferacales	Halorubraceae	Halorubrum	Halorubrum sp. Ea1	Yes		endorheic salt-lake						3911059	3980	67.06	3916	64	3	1	1	0	1	0	2090	2573	867
165	Halorubrum sp. Ea8	Permanent Draft	Halorubrum	University of Connecticut	2791355067	Euryarchaeota	Halobacteria	Haloferacales	Halorubraceae	Halorubrum	Halorubrum sp. Ea8	Yes		endorheic salt-lake						3730411	3758	67.67	3696	62	3	1	1	0	1	0	2038	2532	882
166	Halorubrum sp. Eb13	Permanent Draft	Halorubrum	University of Connecticut	2791355068	Euryarchaeota	Halobacteria	Haloferacales	Halorubraceae	Halorubrum	Halorubrum sp. Eb13	Yes		endorheic salt-lake						3609620	3655	67.6	3592	63	3	1	1	0	1	0	1987	2449	841
167	Halorubrum sp. Hd13	Permanent Draft	Halorubrum	University of Connecticut	2791355069	Euryarchaeota	Halobacteria	Haloferacales	Halorubraceae	Halorubrum	Halorubrum sp. Hd13	Yes		endorheic salt-lake						3800994	3786	67.66	3721	65	3	1	1	0	1	0	2083	2560	898
168	Halorubrum sp. Ib24	Permanent Draft	Halorubrum	University of Connecticut	2791355070	Euryarchaeota	Halobacteria	Haloferacales	Halorubraceae	Halorubrum	Halorubrum sp. Ib24	Yes		endorheic salt-lake						2969809	2947	67.54	2903	44	2	1	0	0	1	0	1543	1937	643
169	Halorubrum sp. SD626R	Permanent Draft	Halorubrum sp. SD626R	University seville	2684622631	Euryarchaeota	Halobacteria	Haloferacales	Halorubraceae	Halorubrum	Halorubrum sp. SD626R	Yes								3247670	3345	67.56	3282	63	4	1	2	0	1	0	1832	2221	881
170	Halorubrum sp. T3	Permanent Draft	Halorubrum sp. T3	Chinese Academy of Sciences, Institute of Botany	2551306368	Euryarchaeota	Halobacteria	Haloferacales	Halorubraceae	Halorubrum	Halorubrum sp. T3	Yes								3167951	3116	68.48	3055	61	5	2	1	0	2	0	1819	2146	793
171	Halorubrum tebenquichense ALT-6, ALT6-92	Permanent Draft	Haloarchaeal genomes	University of California, Davis	2554235490	Euryarchaeota	Halobacteria	Haloferacales	Halorubraceae	Halorubrum	Halorubrum tebenquichense	Yes	Fresh water	Lake Tebenquiche, situated in the northern part of the Atacama Saltern, Chile	-27.32	-70.072	44022	Halophile	Mesophile	3328860	3282	68.03	3235	47	1	1	0	0	0	0	1833	2216	813
172	Halorubrum terrestre JCM 10247	Permanent Draft	Haloarchaeal genomes	University of California, Davis	2554235509	Euryarchaeota	Halobacteria	Haloferacales	Halorubraceae	Halorubrum	Halorubrum terrestre	Yes	Soil	Sulfate saline soil crust in Turkmen, Russia	56.464	36.468	7.5	Halophile	Mesophile	3376225	3299	68.03	3246	53	9	2	2	0	5	0	1874	2261	827
173	Halorubrum trapanicum CBA1232	Finished	Complete genome sequence of Halorubrum trapanicum CBA1232	Korea Basic Science Institute (KBSI)	2775507271	Euryarchaeota	Halobacteria	Haloferacales	Halorubraceae	Halorubrum	Halorubrum trapanicum	Yes								3080199	3052	68.63	2995	57	6	2	2	0	2	0	1771	2058	764
174	Halorubrum tropicale 5	Permanent Draft	Halorubrum tropicale 5 genome sequencing	UPR- Mayaguez	2645727699	Euryarchaeota	Halobacteria	Haloferacales	Halorubraceae	Halorubrum	Halorubrum tropicale	Yes								3567018	3746	67.65	3592	154	4	2	1	0	1	0	1973	2376	844
175	Halorubrum vacuolatum DSM 8800	Permanent Draft	Genomic Encyclopedia of Archaeal and Bacterial Type Strains, Phase II (KMG-II): from individual species to whole genera	DOE Joint Genome Institute (JGI)	2724679803	Euryarchaeota	Halobacteria	Haloferacales	Halorubraceae	Halorubrum	Halorubrum vacuolatum	Yes	Fresh water	Brine from causeway across Lake Magadi, Kenya			9.5	Halophile	Mesophile	3477860	3448	62.89	3372	76	5	3	1	0	1	0	1911	2291	795
176	Halorubrum xinjiangense CGMCC 1.3527	Permanent Draft	Genomic Encyclopedia of Type Strains, Phase III (KMG-III): the genomes of soil and plant-associated and newly described type strains	DOE Joint Genome Institute (JGI)	2617270761	Euryarchaeota	Halobacteria	Haloferacales	Halorubraceae	Halorubrum	Halorubrum xinjiangense	Yes								3261379	3198	68.26	3120	78	9	3	3	0	3	0	1874	2223	812
177	Halosimplex carlsbadense 2-9-1	Permanent Draft	Halosimplex carlsbadense 2-9-1	University of California, Davis	2531839487	Euryarchaeota	Halobacteria	Halobacteriales	Haloarculaceae	Halosimplex	Halosimplex carlsbadense	Yes		unsterilized salt crystals taken from the 250-million-year-old Salado formation in southeastern New Mexico	32.42	-104.228		Halophile	Mesophile	4694889	4505	67.67	4458	47	5	1	1	0	3	0	2345	2902	922
178	Halostagnicola kamekurae DSM 22427	Permanent Draft	Genomic Encyclopedia of Archaeal and Bacterial Type Strains, Phase II (KMG-II): from individual species to whole genera	DOE Joint Genome Institute (JGI)	2639762563	Euryarchaeota	Halobacteria	Natrialbales	Natrialbaceae	Halostagnicola	Halostagnicola kamekurae	Yes		solar salt					Mesophile	4108147	4247	61.45	4184	63	9	2	2	0	5	0	2281	2736	958
179	Halostagnicola larsenii XH-48, DSM 17691	Finished	Completing the genomic survey of haloarchaeal genomes (revised), part 1	DOE Joint Genome Institute (JGI)	2510065051	Euryarchaeota	Halobacteria	Natrialbales	Natrialbaceae	Halostagnicola	Halostagnicola larsenii	Yes	Sediment	sediment of saline Lake Xilinhot, Inner Mongolia, China	43.916	115.616	44020		Mesophile	4131276	4177	60.9	4121	56	6	2	2	0	2	0	2353	2811	1015
180	Halostagnicola sp. A56	Permanent Draft	Halostagnicola sp. A56 Genome sequencing	Agharkar Research Institute	2576861807	Euryarchaeota	Halobacteria	Natrialbales	Natrialbaceae	Halostagnicola	Halostagnicola sp. A56	Yes								4644967	4091	60.47	4038	53	6	3	2	0	1	0	2176	2721	955
181	Haloterrigena daqingensis JX313	Finished	Haloterrigena daqingensis JX313 Genome sequencing	Heilongjiang Academy	2740891999	Euryarchaeota	Halobacteria	Natrialbales	Natrialbaceae	Haloterrigena	Haloterrigena daqingensis	Yes								3835796	3872	61.35	3814	58	6	2	2	0	2	0	2140	2531	872
182	Haloterrigena hispanica DSM 18328	Permanent Draft	Genomic Encyclopedia of Archaeal and Bacterial Type Strains, Phase II (KMG-II): from individual species to whole genera	DOE Joint Genome Institute (JGI)	2816332110	Euryarchaeota	Halobacteria	Natrialbales	Natrialbaceae	Haloterrigena	Haloterrigena hispanica	Yes		Fuente de Piedra salt lake					Mesophile	4256545	4411	60.73	4334	77	19	7	6	0	6	0	2253	2765	870
183	Haloterrigena jeotgali A29	Permanent Draft	Haloterrigena jeotgali A29	Korea Basic Science Institute (KBSI)	2582580504	Euryarchaeota	Halobacteria	Natrialbales	Natrialbaceae	Haloterrigena	Haloterrigena jeotgali	Yes	Fermented food product	shrimp jeotgal, a traditional fermented food			7-7.5	Halotolerant	Mesophile	4131621	4342	64.92	4215	127	14	5	2	0	7	0	2144	2613	866
184	Haloterrigena limicola JCM 13563	Permanent Draft	Haloarchaeal genomes	University of California, Davis	2554235498	Euryarchaeota	Halobacteria	Natrialbales	Natrialbaceae	Haloterrigena	Haloterrigena limicola	Yes	Fresh water	Aibi salt lake in Xin-Jiang, China	43.793	87.627	7	Halophile	Mesophile	3522035	3577	61.8	3521	56	6	1	2	0	3	0	1947	2376	852
185	Haloterrigena mahii H13	Permanent Draft	Haloterrigena mahii H13	National Chung Hsing University	2853959580	Euryarchaeota	Halobacteria	Natrialbales	Natrialbaceae	Haloterrigena	Haloterrigena mahii	Yes	Soil	Salt soil crust in Ashkhabad, USSR				Halophile	Mesophile	3794337	3953	65.11	3892	60	7	3	2	0	2	0	2682	2499	848
186	Haloterrigena saccharevitans AB14	Draft	Haloterrigena saccharevitans AB14	National Chung Hsing University	2667527214	Euryarchaeota	Halobacteria	Natrialbales	Natrialbaceae	Haloterrigena	Haloterrigena saccharevitans	Yes	Soil	Soil from the near-edge floor of Aibi salt lake in Xinjiang, China	43.793	87.627	7.5	Halophile	Mesophile	3980616	3791	65.25	3723	68	17	7	5	0	5	0	2163	2550	916
187	Haloterrigena salifodinae ZY19	Permanent Draft	Haloterrigena salifodinae ZY19	Anhui University	2853968202	Euryarchaeota	Halobacteria	Natrialbales	Natrialbaceae	Haloterrigena	Haloterrigena salifodinae	Yes		rock salt	26.1011	99.7783				4960699	4928	64.49	4867	60	8	5	0	0	3	0	3338	3189	1011
188	Haloterrigena salina JCM 13891	Permanent Draft	Haloarchaeal genomes	University of California, Davis	2554235505	Euryarchaeota	Halobacteria	Natrialbales	Natrialbaceae	Haloterrigena	Haloterrigena salina	Yes	Fresh water	Salt lake Xilinhot in Inner Mongolia, China	43.916	115.616	7.5	Halophile	Mesophile	4841607	4621	65.17	4563	58	7	4	1	0	2	0	2464	3093	1024
189	Haloterrigena sp. H1	Permanent Draft	Haloterrigena sp. H1	National Chung Hsing University	2853963534	Euryarchaeota	Halobacteria	Natrialbales	Natrialbaceae	Haloterrigena	Haloterrigena sp. H1	Yes		solar saltern	32.5872	-117.121				4263024	4667	61.49	4585	76	17	7	5	0	5	0	3090	2892	873
190	Haloterrigena thermotolerans DSM 11552	Permanent Draft	Haloterrigena thermotolerans DSM 11522	University of California, Davis	2534681901	Euryarchaeota	Halobacteria	Natrialbales	Natrialbaceae	Haloterrigena	Haloterrigena thermotolerans	Yes		saltern crystalizer pond						3895275	3910	65.39	3858	52	9	2	2	0	5	0	2079	2550	876
191	Haloterrigena turkmenica VKM B-1734, DSM 5511	Permanent Draft	A Genomic Encyclopedia of Bacteria and Archaea (GEBA)	DOE Joint Genome Institute (JGI)	646311934	Euryarchaeota	Halobacteria	Natrialbales	Natrialbaceae	Haloterrigena	Haloterrigena turkmenica	Yes	Soil	Salt soil crust in Ashkhabad, Turkmenistan	37.95	58.38		Halophile	Mesophile	5440782	5351	64.26	5287	64	10	4	3	0	3	0	2764	3532	1164
192	Halovenus aranensis IBRC-M10015	Permanent Draft	Genomic Encyclopedia of Archaeal and Bacterial Type Strains, Phase II (KMG-II): from individual species to whole genera	DOE Joint Genome Institute (JGI)	2651870124	Euryarchaeota	Halobacteria	Halobacteriales	Halobacteriaceae	Halovenus	Halovenus aranensis	Yes								3287116	3426	61.07	3366	60	7	2	2	0	3	0	1896	2322	811
193	Halovivax asiaticus JCM 14624	Permanent Draft	Haloarchaeal genomes	University of California, Davis	2554235485	Euryarchaeota	Halobacteria	Natrialbales	Natrialbaceae	Halovivax	Halovivax asiaticus	Yes	Sediment	Sediment of the saline Lake Ejinor, Inner Mongolia, China	45.2333	116.533	7-7.5	Halophile	Mesophile	3238452	3175	64.45	3131	44	2	1	0	0	1	0	1716	2137	772
194	Halovivax ruber XH-70, DSM 18193	Finished	Completing the genomic survey of haloarchaeal genomes (revised), part 2	DOE Joint Genome Institute (JGI)	2506783009	Euryarchaeota	Halobacteria	Natrialbales	Natrialbaceae	Halovivax	Halovivax ruber	Yes	Saline water	Saline lake; China, Inner Mongolia, Lake Xilinhot	43.9167	115.617	43991	Halophile	Mesophile	3223876	3193	64.34	3137	56	6	2	2	0	2	0	1758	2115	767
195	Hyperthermus butylicus DSM 5456	Finished	Hyperthermus butylicus DSM 5456	Epidauros Biotechnologie AG	640069314	Crenarchaeota	Thermoprotei	Desulfurococcales	Pyrodictiaceae	Hyperthermus	Hyperthermus butylicus	Yes	Marine	Sea floor of a solfataric environment at 9m depth off the shore of Sao Miguel Island Azores	37.8353	-25.4636	7		Hyperthermophile	1667163	1669	53.74	1616	53	4	1	1	0	1	0	970	1167	475
196	Ignicoccus hospitalis KIN4/I, DSM 18386	Finished	Ignicoccus hospitalis KIN4/I	DOE Joint Genome Institute (JGI)	640753029	Crenarchaeota	Thermoprotei	Desulfurococcales	Desulfurococcaceae	Ignicoccus	Ignicoccus hospitalis	Yes	Hot spring	Shallow marine hydrothermal system of the Kolbeinsey Ridge, north of Iceland	66.67	-18.5			Hyperthermophile	1297538	1496	56.52	1444	52	4	2	1	0	1	0	865	1000	478
197	Ignisphaera aggregans AQ1.S1, DSM 17230	Finished	A Genomic Encyclopedia of Bacteria and Archaea (GEBA)	DOE Joint Genome Institute (JGI)	648028035	Crenarchaeota	Thermoprotei	Desulfurococcales	Desulfurococcaceae	Ignisphaera	Ignisphaera aggregans	Yes	Hot spring	hot springs in Rotorua and Tokaanu, New Zealand	-38.1317	176.242	6.4		Hyperthermophile	1875953	2042	35.69	1992	50	3	1	1	0	1	0	1079	1318	517
198	Metallosphaera cuprina Ar-4	Finished	Metallosphaera cuprina Ar-4	Chinese Academy of Sciences	650716051	Crenarchaeota	Thermoprotei	Sulfolobales	Sulfolobaceae	Metallosphaera	Metallosphaera cuprina	Yes	Hot spring	sulfuric hot spring in Tengchong, Yunnan, China	25.083	98.489	3.5		Thermophile	1840348	2077	41.99	2029	48	3	1	1	0	1	0	1233	1414	625
199	Metallosphaera sedula DSM 5348	Finished	Metallosphaera sedula DSM 5348	DOE Joint Genome Institute (JGI)	640427120	Crenarchaeota	Thermoprotei	Sulfolobales	Sulfolobaceae	Metallosphaera	Metallosphaera sedula	Yes	Ponds	Thermal pond in the Pisciarelli Solfatara in Italy	40.833	14.15	2		Thermophile	2191517	2347	46.23	2293	54	3	1	1	0	1	0	1426	1686	690
200	Methanimicrococcus blatticola DSM 13328	Permanent Draft	Genomic Encyclopedia of Type Strains, Phase IV (KMG-IV): sequencing the most valuable type-strain genomes for metagenomic binning, comparative biology and taxonomic classification	DOE Joint Genome Institute (JGI)	2756170388	Euryarchaeota	Methanomicrobia	Methanosarcinales	Methanosarcinaceae	Methanimicrococcus	Methanimicrococcus blatticola	Yes								1783317	1615	41.98	1561	54	6	4	1	0	1	0	1035	1198	523
201	Methanobacterium bryantii M.o.H.	Permanent Draft	Methanobacterium bryantii M.o.H. genome sequencing	University of California, Santa Barbara	2791355014	Euryarchaeota	Methanobacteria	Methanobacteriales	Methanobacteriaceae	Methanobacterium	Methanobacterium bryantii	Yes								3459568	3367	33.18	3323	44	3	1	1	0	1	0	1893	2450	724
202	Methanobacterium congolense Buetzberg	Finished	Complete genome of Methanobacterium congolense Buetzberg	Center for Biotechnology (CeBiTec), Bielefeld Univeristy	2728369539	Euryarchaeota	Methanobacteria	Methanobacteriales	Methanobacteriaceae	Methanobacterium	Methanobacterium congolense	Yes			52.02	8.53				2469575	2430	38.49	2373	57	10	4	3	0	3	0	1546	1861	643
203	Methanobacterium formicicum BRM9	Finished	Methanobacterium formicicum BRM9	Pastoral Greenhouse Gas Research Consortium (PGgRc)	2630968343	Euryarchaeota	Methanobacteria	Methanobacteriales	Methanobacteriaceae	Methanobacterium	Methanobacterium formicicum	Yes	Host	rumen of a New Zealand Friesan cow grazing a ryegrass/clover pasture	-40.3809	175.615			Mesophile	2449987	2452	41.34	2397	55	7	3	2	0	2	0	1595	1916	666
204	Methanobacterium lacus AL-21	Finished	Genome sequencing and comparison of novel methanogens from peatlands and bioreactors	DOE Joint Genome Institute (JGI)	650716052	Euryarchaeota	Methanobacteria	Methanobacteriales	Methanobacteriaceae	Methanobacterium	Methanobacterium lacus	Yes	Fresh water	poor fen under a boreal climate	61.5333	-150.45	4.7-7.1		Mesophile	2583753	2584	35.83	2533	51	7	3	2	0	2	0	1606	1965	696
205	Methanobacterium paludis SWAN-1	Finished	Genome sequencing and comparison of novel methanogens from peatlands and bioreactors	DOE Joint Genome Institute (JGI)	650716053	Euryarchaeota	Methanobacteria	Methanobacteriales	Methanobacteriaceae	Methanobacterium	Methanobacterium paludis	Yes							Mesophile	2546541	2500	35.73	2442	58	9	3	3	0	3	0	1552	1867	687
206	Methanobacterium sp. MB1	Finished	Complete Genome Sequence of the Hydrogenotrophic Archaeon Methanobacterium sp., Isolated from a Production-Scale Biogas Plant	Bielefeld University	2636415780	Euryarchaeota	Methanobacteria	Methanobacteriales	Methanobacteriaceae	Methanobacterium	Methanobacterium sp. MB1	Yes								2029766	2068	39.74	2016	52	7	3	2	0	2	0	1440	1681	649
207	Methanobacterium sp. MZ-A1	Finished	Comparative genomics of isolates from deep and shallow subsurface biosphere	Japan Agency for Marine-Earth Science and Technology	2775506919	Euryarchaeota	Methanobacteria	Methanobacteriales	Methanobacteriaceae	Methanobacterium	Methanobacterium sp. MZ-A1	Yes		deep subseafloor coal bed	41.1	142.12				2524329	2485	39.38	2435	50	7	3	2	0	2	0	1568	1942	643
208	Methanobacterium sp. SMA-27	Permanent Draft	Genomic basis of thermal adaption and carbon metabolism in permafrost isolates	DOE Joint Genome Institute (JGI)	2582581250	Euryarchaeota	Methanobacteria	Methanobacteriales	Methanobacteriaceae	Methanobacterium	Methanobacterium sp. SMA-27	Yes								2490725	2621	32.57	2572	49	4	2	1	0	1	0	1597	1936	694
209	Methanobacterium subterraneum MO-MB1	Finished	Comparative genomics of isolates from deep and shallow subsurface biosphere	Japan Agency for Marine-Earth Science and Technology	2775506917	Euryarchaeota	Methanobacteria	Methanobacteriales	Methanobacteriaceae	Methanobacterium	Methanobacterium subterraneum	Yes		subseafloor sediment	41.1	142.12				2506225	2501	39.43	2451	50	7	3	2	0	2	0	1527	1909	637
210	Methanobacterium veterum MK4, DSM 19849	Permanent Draft	Genomic biology of novel permafrost methanogens: Methanobacterium veterum and M. arcticum	DOE Joint Genome Institute (JGI)	2582580744	Euryarchaeota	Methanobacteria	Methanobacteriales	Methanobacteriaceae	Methanobacterium	Methanobacterium veterum	Yes	Permafrost sediment	ancient (3 million years old) permafrost sediments	70.1	154.067	7-7.2		Psychrophile	3369555	3319	33.21	3271	48	6	3	2	0	1	0	1907	2460	746
211	Methanobrevibacter arboriphilicus DH1	Permanent Draft	Methanobrevibacter arboriphilus DH1	Goettingen Genomics Laboratory	2627853524	Euryarchaeota	Methanobacteria	Methanobacteriales	Methanobacteriaceae	Methanobrevibacter	Methanobrevibacter arboriphilus	Yes	Wood	Eastern Cotton Wood tree, Madison	43.0849	-89.3993	7.5		Mesophile	2445031	2007	25.44	1959	48	7	3	2	0	2	0	1233	1500	607
212	Methanobrevibacter boviskoreani JH1	Permanent Draft	Methanobrevibacter sp. JH1	Korea Research Institute of Bioscience and Biotechnology	2551306657	Euryarchaeota	Methanobacteria	Methanobacteriales	Methanobacteriaceae	Methanobrevibacter	Methanobrevibacter boviskoreani	Yes								2045801	1799	28.98	1756	43	4	2	1	0	1	0	1192	1371	594
213	Methanobrevibacter curvatus DSM11111	Permanent Draft	Sequencing of Methanobrevibacter genomes	Goettingen Genomics Laboratory	2684622742	Euryarchaeota	Methanobacteria	Methanobacteriales	Methanobacteriaceae	Methanobrevibacter	Methanobrevibacter curvatus	Yes		hindgut of subterranean termite, Reticulitermes flavipes						2380562	2007	25.66	1966	41	4	2	1	0	1	0	1144	1495	555
214	Methanobrevibacter cuticularis DSM11139	Permanent Draft	Sequencing of Methanobrevibacter genomes	Goettingen Genomics Laboratory	2684622743	Euryarchaeota	Methanobacteria	Methanobacteriales	Methanobacteriaceae	Methanobrevibacter	Methanobrevibacter cuticularis	Yes		hindgut of subterranean termite, Reticulitermes flavipes						2572262	2131	26.76	2091	40	3	1	1	0	1	0	1166	1498	568
215	Methanobrevibacter filiformis DSM11501	Permanent Draft	Sequencing of Methanobrevibacter genomes	Goettingen Genomics Laboratory	2684622740	Euryarchaeota	Methanobacteria	Methanobacteriales	Methanobacteriaceae	Methanobrevibacter	Methanobrevibacter filiformis	Yes		hindgut of subterranean termite, Reticulitermes flavipes						2563611	2053	26.97	2011	42	9	3	3	0	3	0	1111	1450	563
216	Methanobrevibacter gottschalkii DSM 11978	Permanent Draft	The Hungate 1000. A catalogue of reference genomes from the rumen microbiome.	DOE Joint Genome Institute (JGI)	2654588138	Euryarchaeota	Methanobacteria	Methanobacteriales	Methanobacteriaceae	Methanobrevibacter	Methanobrevibacter gottschalkii	Yes		pig faeces					Mesophile	1864477	1942	30.24	1895	47	8	4	2	0	2	0	1235	1431	604
217	Methanobrevibacter millerae SM9	Finished	Methanobrevibacter millerae SM9	Pastoral Greenhouse Gas Research Consortium (PGgRc)	2654587756	Euryarchaeota	Methanobacteria	Methanobacteriales	Methanobacteriaceae	Methanobrevibacter	Methanobrevibacter millerae	Yes	Host	Sheep rumen					Mesophile	2543538	2365	31.81	2313	52	7	3	2	0	2	0	1383	1737	621
218	Methanobrevibacter olleyae DSM 16632	Permanent Draft	The Hungate 1000. A catalogue of reference genomes from the rumen microbiome.	DOE Joint Genome Institute (JGI)	2593339150	Euryarchaeota	Methanobacteria	Methanobacteriales	Methanobacteriaceae	Methanobrevibacter	Methanobrevibacter olleyae	Yes	Rumen	sheep rumen					Mesophile	2122444	1854	26.81	1813	41	4	2	1	0	1	0	1230	1429	604
219	Methanobrevibacter oralis DSM7256	Permanent Draft	Sequencing of Methanobrevibacter genomes	Goettingen Genomics Laboratory	2684622741	Euryarchaeota	Methanobacteria	Methanobacteriales	Methanobacteriaceae	Methanobrevibacter	Methanobrevibacter oralis	Yes		human oral cavity						2110861	2080	27.73	2036	44	9	3	3	0	3	0	1209	1460	603
220	Methanobrevibacter ruminantium M1	Finished	Methanobrevibacter ruminantium M1	AgResearch Limited	646311943	Euryarchaeota	Methanobacteria	Methanobacteriales	Methanobacteriaceae	Methanobrevibacter	Methanobrevibacter ruminantium	Yes	Host	Bovine rumen					Mesophile	2937203	2283	32.64	2217	66	8	4	2	0	2	0	1285	1659	611
221	Methanobrevibacter smithii PS, ATCC 35061	Finished	Methanobrevibacter smithii PS, ATCC 35061	Washington University in St. Louis	640427121	Euryarchaeota	Methanobacteria	Methanobacteriales	Methanobacteriaceae	Methanobrevibacter	Methanobrevibacter smithii	Yes	Host	Sewage digester in Gainesville Florida	29.651	-82.325			Mesophile	1853160	1841	31.03	1795	46	8	3	2	0	2	0	1131	1370	594
222	Methanobrevibacter sp. AbM4	Finished	Methanobrevibacter sp. AbM4	AgResearch Limited	2540341183	Euryarchaeota	Methanobacteria	Methanobacteriales	Methanobacteriaceae	Methanobrevibacter	Methanobrevibacter sp. AbM4	Yes	Host	ovine rumen	-40.35	175.61			Mesophile	1998189	1716	29.04	1671	45	9	3	3	0	3	0	1201	1357	589
223	Methanobrevibacter sp. YE315	Permanent Draft	Methanobrevibacter sp. YE315 Genome Sequence	Queensland Government	2667527400	Euryarchaeota	Methanobacteria	Methanobacteriales	Methanobacteriaceae	Methanobrevibacter	Methanobrevibacter sp. YE315	Yes								2273296	1982	34.25	1942	40	7	3	2	0	2	0	1279	1513	593
224	Methanobrevibacter thaueri DSM 11995	Permanent Draft	Methanobrevibacter type strains	Commonwealth Scientific and Industrial Research Organisation (CSIRO)	2622736427	Euryarchaeota	Methanobacteria	Methanobacteriales	Methanobacteriaceae	Methanobrevibacter	Methanobrevibacter thaueri	Yes	Host	bovine faeces					Mesophile	2244956	2184	36.97	2135	49	11	3	4	0	4	0	1300	1601	602
225	Methanobrevibacter woesei DSM 11979	Permanent Draft	Methanobrevibacter type strains	Commonwealth Scientific and Industrial Research Organisation (CSIRO)	2622736428	Euryarchaeota	Methanobacteria	Methanobacteriales	Methanobacteriaceae	Methanobrevibacter	Methanobrevibacter woesei	Yes								1544134	1628	29.89	1583	45	10	3	4	0	3	0	1132	1294	563
226	Methanobrevibacter wolinii SH	Permanent Draft	The Hungate 1000. A catalogue of reference genomes from the rumen microbiome.	DOE Joint Genome Institute (JGI)	2558860120	Euryarchaeota	Methanobacteria	Methanobacteriales	Methanobacteriaceae	Methanobrevibacter	Methanobrevibacter wolinii	Yes	Rumen							2041814	1747	24.21	1700	47	8	2	4	0	2	0	1173	1352	594
227	Methanocaldococcus fervens AG86	Finished	CSP_787660, Methanoarchaea	DOE Joint Genome Institute (JGI)	644736385	Euryarchaeota	Methanococci	Methanococcales	Methanocaldococcaceae	Methanocaldococcus	Methanocaldococcus fervens	Yes	Deep sea	Deep-sea hydrothermal chimney sample collected on the East Pacific Rise at a depth of 2600m	28.0836	-111.409	6.5		Thermophile	1507251	1663	32.22	1620	43	6	2	2	0	2	0	1211	1332	582
228	Methanocaldococcus infernus ME	Finished	CSP_787660, Methanoarchaea	DOE Joint Genome Institute (JGI)	646564547	Euryarchaeota	Methanococci	Methanococcales	Methanocaldococcaceae	Methanocaldococcus	Methanocaldococcus infernus	Yes	Deep sea	Deep-sea hydrothermal chimney sample collected on the Mid-Atlantic Ridge at a depth of 3000m			6.5		Thermophile	1328194	1513	33.62	1467	46	6	2	2	0	2	0	1136	1280	591
229	Methanocaldococcus jannaschii DSM 2661	Finished	Methanocaldococcus jannaschii DSM 2661	J. Craig Venter Institute (JCVI)	638154505	Euryarchaeota	Methanococci	Methanococcales	Methanocaldococcaceae	Methanocaldococcus	Methanocaldococcus jannaschii	Yes	Hot spring	Deep-sea hydrothermal vent in 1982			5.2-7		Hyperthermophile	1739927	1844	31.29	1789	55	6	2	2	0	2	0	1319	1441	576
230	Methanocaldococcus sp. FS406-22	Finished	CSP_787660, Methanoarchaea	DOE Joint Genome Institute (JGI)	646564548	Euryarchaeota	Methanococci	Methanococcales	Methanocaldococcaceae	Methanocaldococcus	Methanocaldococcus sp. FS406-22	Yes	Deep sea	Deep-sea hydrothermal vent from Pacific Ocean Axial volcano on the Juan de Fuca Ridge	23.3667	-44.9333			Thermophile	1773136	1893	32.04	1849	44	6	2	2	0	2	0	1304	1467	600
231	Methanocaldococcus villosus KIN24-T80	Permanent Draft	Methanocaldococcus villosus KIN24-T80 Genome sequencing	King Abdullah University of Science and Technology	2554235511	Euryarchaeota	Methanococci	Methanococcales	Methanocaldococcaceae	Methanocaldococcus	Methanocaldococcus villosus	Yes	Sediment	Hot marine sediment	67.096	-18.711			Hyperthermophile	1207361	1326	29.36	1295	31	3	1	0	0	2	0	995	1127	535
232	Methanocaldococcus vulcanius M7, DSM 12094	Finished	CSP_787660, Methanoarchaea	DOE Joint Genome Institute (JGI)	646311944	Euryarchaeota	Methanococci	Methanococcales	Methanocaldococcaceae	Methanocaldococcus	Methanocaldococcus vulcanius	Yes	Deep sea	Deep-sea hydrothermal chimney sample collected on the East Pacific Rise at a depth of 2600m			6.5		Thermophile	1761737	1808	31.58	1765	43	6	2	2	0	2	0	1234	1384	593
233	Methanocella arvoryzae MRE50	Finished	Methanocella sp. RC-I	Max Planck Institute	2505679073	Euryarchaeota	Methanomicrobia	Methanocellales	Methanocellaceae	Methanocella	Methanocella arvoryzae	Yes	Soil	Italian Rice field soil					Mesophile	3179916	3177	54.6	3115	62	9	3	3	0	3	0	1863	2315	750
234	Methanocella conradii HZ254	Finished	Methanocella conradii HZ254	China Agricultural University	2512564055	Euryarchaeota	Methanomicrobia	Methanocellales	Methanocellaceae	Methanocella	Methanocella conradii	Yes	Rice paddies	Hangzhou	30.0769	119.91			Thermophile	2378438	2512	52.74	2455	57	6	2	2	0	2	0	1566	1877	704
235	Methanocella paludicola SANAE	Finished	Methanocella paludicola SANAE	National Institute of Technology and Evaluation	2505679075	Euryarchaeota	Methanomicrobia	Methanocellales	Methanocellaceae	Methanocella	Methanocella paludicola	Yes	Soil	Rice paddy soil; Japan, Niigata, Nakanoshima	35.63	139.55	6.5-7.8		Mesophile	2957635	3123	54.92	3065	58	8	4	2	0	2	0	1780	2233	759
236	Methanococcoides burtonii DSM 6242	Finished	Methanococcoides burtonii DSM 6242	DOE Joint Genome Institute (JGI)	637000161	Euryarchaeota	Methanomicrobia	Methanosarcinales	Methanosarcinaceae	Methanococcoides	Methanococcoides burtonii	Yes	Antarctic	Anoxic hypolimnion of Ace Lake Antarctica	-68.4792	-78.1836			Psychrophile	2575032	2506	40.76	2431	75	12	6	3	0	3	0	1592	1910	722
237	Methanococcoides methylutens DSM 2657	Permanent Draft	Methanococcoides methylutens DSM 2657 Genome sequencing	King Abdullah University of Science and Technology	2630968972	Euryarchaeota	Methanomicrobia	Methanosarcinales	Methanosarcinaceae	Methanococcoides	Methanococcoides methylutens	Yes		marine sediment					Mesophile	2508511	2527	42.5	2462	65	10	5	4	0	1	0	1618	1906	757
238	Methanococcoides vulcani SLH 33	Permanent Draft	Deep subsurface shale carbon reservoir microbial communities from Ohio and West Virginia, USA	DOE Joint Genome Institute (JGI)	2642422537	Euryarchaeota	Methanomicrobia	Methanosarcinales	Methanosarcinaceae	Methanococcoides	Methanococcoides vulcani	Yes		Deep-sea sediment covered by an orange microbial mat						2314846	2357	43.44	2290	67	7	4	2	0	1	0	1569	1802	747
239	Methanococcus aeolicus Nankai-3	Finished	5 mesophilic methanococci Proposal # 0179-051115	DOE Joint Genome Institute (JGI)	640753034	Euryarchaeota	Methanococci	Methanococcales	Methanococcaceae	Methanococcus	Methanococcus aeolicus	Yes	Marine	Deep marine sediment from the Nankai Trough off the coast of Japan	33.2167	136.717			Mesophile	1569500	1554	30.04	1503	51	8	4	2	0	2	0	1157	1303	611
240	Methanococcus maripaludis S2	Finished	Methanococcus maripaludis S2	University of Washington	2563366543	Euryarchaeota	Methanococci	Methanococcales	Methanococcaceae	Methanococcus	Methanococcus maripaludis	Yes	Hypersaline	Salt marsh sediment near Pawley Island South Carolina	32.8018	-79.8755	6.5-8		Mesophile	1661137	1772	33.1	1722	50	10	4	3	0	3	0	1302	1474	629
241	Methanococcus vannielii SB	Finished	5 mesophilic methanococci Proposal # 0179-051115	DOE Joint Genome Institute (JGI)	640753036	Euryarchaeota	Methanococci	Methanococcales	Methanococcaceae	Methanococcus	Methanococcus vannielii	Yes	Marine	San Francisco Bay mud flat	37.691	-122.311			Mesophile	1720048	1755	31.33	1701	54	13	5	4	0	4	0	1261	1452	640
242	Methanococcus voltae A3	Finished	5 mesophilic methanococci Proposal # 0179-051115	DOE Joint Genome Institute (JGI)	646564549	Euryarchaeota	Methanococci	Methanococcales	Methanococcaceae	Methanococcus	Methanococcus voltae	Yes	Fresh water	Salt marsh					Mesophile	1936387	1768	28.59	1721	47	7	3	2	0	2	0	1170	1370	595
243	Methanocorpusculum bavaricum DSM 4179	Permanent Draft	Genomic Encyclopedia of Type Strains, Phase I: the one thousand microbial genomes (KMG-I) project	DOE Joint Genome Institute (JGI)	2524614668	Euryarchaeota	Methanomicrobia	Methanomicrobiales	Methanocorpusculaceae	Methanocorpusculum	Methanocorpusculum bavaricum	Yes	Sediment	Muddy sediment of wastewater pond	49.0147	12.1249	7		Mesophile	1706782	1801	51.43	1744	57	5	3	1	0	1	0	1167	1354	601
244	Methanocorpusculum labreanum Z	Finished	Diverse archaeal organisms	DOE Joint Genome Institute (JGI)	640069317	Euryarchaeota	Methanomicrobia	Methanomicrobiales	Methanocorpusculaceae	Methanocorpusculum	Methanocorpusculum labreanum	Yes	Fresh water	Surface sediment from the LaBrea Tar Pits in Los Angeles	34.1078	-118.6			Mesophile	1804962	1830	50.01	1765	65	9	3	3	0	3	0	1221	1440	625
245	Methanocorpusculum parvum XII	Permanent Draft	Methanocorpusculum parvum XII genome sequencing	University of California, Santa Barbara	2791354905	Euryarchaeota	Methanomicrobia	Methanomicrobiales	Methanocorpusculaceae	Methanocorpusculum	Methanocorpusculum parvum	Yes								1705083	1773	51.44	1720	53	3	1	1	0	1	0	1183	1370	587
246	Methanoculleus bourgensis MS2	Finished	Methanoculleus bourgensis MS2	irena.maus	2540341105	Euryarchaeota	Methanomicrobia	Methanomicrobiales	Methanomicrobiaceae	Methanoculleus	Methanoculleus bourgensis	Yes	Sludge	sewage sludge digester					Mesophile	2789773	2667	60.64	2619	48	3	1	1	0	1	0	1622	1952	716
247	Methanoculleus marisnigri JR1, DSM 1498	Finished	Diverse archaeal organisms	DOE Joint Genome Institute (JGI)	640069318	Euryarchaeota	Methanomicrobia	Methanomicrobiales	Methanomicrobiaceae	Methanoculleus	Methanoculleus marisnigri	Yes	Marine	Sediment from the Black Sea					Mesophile	2478101	2560	62.06	2506	54	3	1	1	0	1	0	1605	1942	735
248	Methanoculleus sp. MAB1	Finished	Methanoculleus sp MAB1 the syntrophic partner of acetate oxidizing bacteria	Swedish University of Agricultural Sciences	2681813425	Euryarchaeota	Methanomicrobia	Methanomicrobiales	Methanomicrobiaceae	Methanoculleus	Methanoculleus sp. MAB1	Yes								2859299	3059	60.26	3010	49	3	1	1	0	1	0	1496	2125	810
249	Methanoculleus sp. MH98A	Permanent Draft	Methanoculleus sp. MH98A Genome sequencing	Agharkar Research Institute	2576861808	Euryarchaeota	Methanomicrobia	Methanomicrobiales	Methanomicrobiaceae	Methanoculleus	Methanoculleus sp. MH98A	Yes		subsurface methane hydrate sediment sample from Krishna Godavari Basin						2542436	2370	61.44	2317	53	2	1	1	0	0	0	1492	1830	676
250	Methanoculleus thermophilus DSM 2373	Permanent Draft	Genomic Encyclopedia of Archaeal and Bacterial Type Strains, Phase II (KMG-II): from individual species to whole genera	DOE Joint Genome Institute (JGI)	2634166298	Euryarchaeota	Methanomicrobia	Methanomicrobiales	Methanomicrobiaceae	Methanoculleus	Methanoculleus thermophilus	Yes	Sediment	effluent channel of nuclear power plant			7		Thermophile	2217720	2320	59.33	2250	70	11	5	3	0	3	0	1503	1784	712
251	Methanofollis ethanolicus JCM 15103	Permanent Draft	Methanofollis ethanolicus JCM 15103T whole genome shotgun sequence	Bioproduction Research Institute, National Institute of Advanced Industrial Science and Technology (AIST)	2684622607	Euryarchaeota	Methanomicrobia	Methanomicrobiales	Methanomicrobiaceae	Methanofollis	Methanofollis ethanolicus	Yes								2713913	2715	60.33	2660	55	4	2	1	0	1	0	1630	1976	699
252	Methanofollis liminatans GKZPZ, DSM 4140	Finished	A Genomic Encyclopedia of Bacteria and Archaea (GEBA)	DOE Joint Genome Institute (JGI)	2506783068	Euryarchaeota	Methanomicrobia	Methanomicrobiales	Methanomicrobiaceae	Methanofollis	Methanofollis liminatans	Yes	Wastewater treatment plant	Industrial wastewater treatment plant from Germany					Mesophile	2475100	2522	60.97	2465	57	6	2	2	0	2	0	1644	1942	707
253	Methanohalobium evestigatum Z-7303, DSM 3721	Finished	Comparative genomics of the Archaea	DOE Joint Genome Institute (JGI)	648028039	Euryarchaeota	Methanomicrobia	Methanosarcinales	Methanosarcinaceae	Methanohalobium	Methanohalobium evestigatum	Yes	Fresh water	Microbial mat community in Crimea, Russia	45.3453	34.4997	7	Halophile	Thermophile	2406232	2437	36.42	2378	59	6	2	2	0	2	0	1531	1817	684
254	Methanohalophilus euhalobius WG-1MB	Permanent Draft	Subsurface microbial communities from deep shales in Ohio and West Virginia, USA	DOE Joint Genome Institute (JGI)	2703719067	Euryarchaeota	Methanomicrobia	Methanosarcinales	Methanosarcinaceae	Methanohalophilus	Methanohalophilus euhalobius	Yes			40.178	-81.073				1940298	2096	42.12	2040	56	5	3	1	0	1	0	1387	1608	658
255	Methanohalophilus halophilus Z-7982	Permanent Draft	Deep subsurface shale carbon reservoir microbial communities from Ohio and West Virginia, USA	DOE Joint Genome Institute (JGI)	2642422606	Euryarchaeota	Methanomicrobia	Methanosarcinales	Methanosarcinaceae	Methanohalophilus	Methanohalophilus halophilus	Yes		Cyanobacterial mat and bottom						2026562	2126	42.44	2061	65	10	2	4	0	4	0	1466	1680	701
256	Methanohalophilus mahii SLP, DSM 5219	Finished	A Genomic Encyclopedia of Bacteria and Archaea (GEBA)	DOE Joint Genome Institute (JGI)	646564550	Euryarchaeota	Methanomicrobia	Methanosarcinales	Methanosarcinaceae	Methanohalophilus	Methanohalophilus mahii	Yes	Sediment	Anaerobic sediment from Great Salt Lake, USA	41.177	-112.502	6.5-7.5	Halophile	Mesophile	2012424	2095	42.62	2032	63	9	3	3	0	3	0	1437	1668	701
257	Methanohalophilus portucalensis FDF-1	Finished	Methanohalophilus portucalensis FDF-1 genome sequencing	Universite de Bretagne Occidentale	2806310721	Euryarchaeota	Methanomicrobia	Methanosarcinales	Methanosarcinaceae	Methanohalophilus	Methanohalophilus portucalensis	Yes		sediments from a salinarium in Figeria da Foz	40.151	-8.87012			Mesophile	2084975	2170	41.95	2111	59	7	3	2	0	2	0	1454	1678	679
258	Methanolacinia petrolearia DSM 11571	Finished	A Genomic Encyclopedia of Bacteria and Archaea (GEBA)	DOE Joint Genome Institute (JGI)	648028040	Euryarchaeota	Methanomicrobia	Methanomicrobiales	Methanomicrobiaceae	Methanolacinia	Methanolacinia petrolearia	Yes	Marine	Offshore oil field from Gulf of Guinea			7		Mesophile	2843290	2881	47.4	2824	57	7	3	2	0	2	0	1657	2082	737
259	Methanolobus profundi Mob M	Permanent Draft	Deep subsurface shale carbon reservoir microbial communities from Ohio and West Virginia, USA	DOE Joint Genome Institute (JGI)	2642422540	Euryarchaeota	Methanomicrobia	Methanosarcinales	Methanosarcinaceae	Methanolobus	Methanolobus profundi	Yes		Deep subsurface sediment of gas field						3107200	3000	42.58	2935	65	11	4	4	0	3	0	1873	2208	816
260	Methanolobus psychrophilus R15	Finished	Methanolobus psychrophilus R15	Beijing Genomics Institute (BGI)	2519103099	Euryarchaeota	Methanomicrobia	Methanosarcinales	Methanosarcinaceae	Methanolobus	Methanolobus psychrophilus	Yes								3072769	3229	44.61	3167	62	10	4	3	0	3	0	1833	2229	779
261	Methanolobus tindarius DSM 2278	Permanent Draft	Continuation of the Genomic Encyclopedia of Bacteria and Archaea pilot project (GEBA)	DOE Joint Genome Institute (JGI)	2515075008	Euryarchaeota	Methanomicrobia	Methanosarcinales	Methanosarcinaceae	Methanolobus	Methanolobus tindarius	Yes	Sediment	Sediment from Lakes of Marinello, Italy	38.1326	15.0542			Mesophile	3151883	3022	39.79	2957	65	9	3	3	0	3	0	1872	2207	807
262	Methanolobus vulcani PL 12/M	Permanent Draft	Deep subsurface shale carbon reservoir microbial communities from Ohio and West Virginia, USA	DOE Joint Genome Institute (JGI)	2642422561	Euryarchaeota	Methanomicrobia	Methanosarcinales	Methanosarcinaceae	Methanolobus	Methanolobus vulcani	Yes		Submarine fumarole						2947907	2902	40.27	2841	61	8	3	4	0	1	0	1870	2182	791
263	Methanomassiliicoccus luminyensis B10	Permanent Draft	Methanomassiliicoccus luminyensis B10	Aix-Marseille University	2518645582	Euryarchaeota	Thermoplasmata	Methanomassiliicoccales	Methanomassiliicoccaceae	Methanomassiliicoccus	Methanomassiliicoccus luminyensis	Yes	Host	faeces from an 86-year-old healthy man					Mesophile	2620233	2669	60.48	2625	44	2	0	1	0	1	0	1540	1881	758
264	Methanomethylovorans hollandica DSM 15978	Finished	A Genomic Encyclopedia of Bacteria and Archaea (GEBA)	DOE Joint Genome Institute (JGI)	2509601008	Euryarchaeota	Methanomicrobia	Methanosarcinales	Methanosarcinaceae	Methanomethylovorans	Methanomethylovorans hollandica	Yes	Sediment	Anaerobic top layer (5 to 10 cm) of sediment (depth, 50 cm) in a eutrophic freshwater pond at the Dekkerswald Institute, Nijmegen, The Netherlands			6.5-7		Mesophile	2714013	2732	41.87	2666	66	6	2	2	0	2	0	1668	1976	740
265	Methanomicrobium mobile DSM 1539	Permanent Draft	The Hungate 1000. A catalogue of reference genomes from the rumen microbiome.	DOE Joint Genome Institute (JGI)	2571042922	Euryarchaeota	Methanomicrobia	Methanomicrobiales	Methanomicrobiaceae	Methanomicrobium	Methanomicrobium mobile	Yes	Host	Bovine rumen			6.1		Mesophile	1711791	1686	49.46	1625	61	7	3	1	0	3	0	1119	1288	567
266	Methanonatronarchaeum thermophilum AMET1	Permanent Draft	Methanonatronarchaeum thermophilum strain:AMET1	National Center for Biotechnology Information	2786546529	Euryarchaeota	Methanonatronarchaeia	Methanonatronarchaeales	Methanonatronarchaeaceae	Methanonatronarchaeum	Methanonatronarchaeum thermophilum	Yes		hypersaline soda lakes	51.39	79.5				1513137	1562	37.9	1520	42	2	0	1	0	1	0	1043	1204	533
267	Methanoplanus limicola M3, DSM 2279	Permanent Draft	A Genomic Encyclopedia of Bacteria and Archaea (GEBA)	DOE Joint Genome Institute (JGI)	2506381025	Euryarchaeota	Methanomicrobia	Methanomicrobiales	Methanomicrobiaceae	Methanoplanus	Methanoplanus limicola	Yes	Mud	Mud of drilling swamp from Italy	40.8119	14.0748			Mesophile	3200946	3129	42.2	3064	65	7	5	1	0	1	0	1777	2217	770
268	Methanopyrus kandleri AV19	Finished	Methanopyrus kandleri AV19	Fidelity Systems Inc	638154507	Euryarchaeota	Methanopyri	Methanopyrales	Methanopyraceae	Methanopyrus	Methanopyrus kandleri	Yes	Marine	Black smoker from the Gulf of California at a depth of 2000m			5.5-7		Hyperthermophile	1694969	1766	61.16	1726	40	3	1	1	0	1	0	1149	1241	525
269	Methanopyrus sp. KOL6	Finished	Genome sequencing of Methanopyrus sp. KOL6	Zhejiang University	2757320861	Euryarchaeota	Methanopyri	Methanopyrales	Methanopyraceae	Methanopyrus	Methanopyrus sp. KOL6	Yes		ocean						1430309	1573	57.67	1536	37	3	1	1	0	1	0	1089	1154	510
270	Methanopyrus sp. SNP6	Finished	Genome sequencing of Methanopyrus sp. SNP6	Zhejiang University	2757320857	Euryarchaeota	Methanopyri	Methanopyrales	Methanopyraceae	Methanopyrus	Methanopyrus sp. SNP6	Yes		ocean						1421621	1574	58	1537	37	3	1	1	0	1	0	1078	1158	508
271	Methanoregula boonei 6A8	Finished	Acidic Peat Bog methanogen	DOE Joint Genome Institute (JGI)	640753014	Euryarchaeota	Methanomicrobia	Methanomicrobiales	Methanoregulaceae	Methanoregula	Methanoregula boonei	Yes	Fresh water	Acidic peat bog in New York State			43927		Mesophile	2542943	2518	54.51	2464	54	3	1	1	0	1	0	1547	1894	705
272	Methanoregula formicica SMSP, DSM 22288	Finished	Genome sequencing and comparison of novel methanogens from peatlands and bioreactors	DOE Joint Genome Institute (JGI)	2508501105	Euryarchaeota	Methanomicrobia	Methanomicrobiales	Methanoregulaceae	Methanoregula	Methanoregula formicica	Yes	Sludge	methanogenic sludge in a mesophilic upflow anaerobic sludge blanket (UASB) reactor used to treat a beer brewery effluent			7-7.6		Mesophile	2820858	2925	55.2	2870	55	3	1	1	0	1	0	1661	2056	756
273	Methanosalsum zhilinae WeN5, DSM 4017	Finished	A Genomic Encyclopedia of Bacteria and Archaea (GEBA)	DOE Joint Genome Institute (JGI)	2502790017	Euryarchaeota	Methanomicrobia	Methanosarcinales	Methanosarcinaceae	Methanosalsum	Methanosalsum zhilinae	Yes	Sediment	Sediment of alkaline lake in Wadi el Natrun, Egypt	30.4372	30.3344		Halophile	Mesophile	2138444	2083	39.16	2025	58	6	0	3	0	3	0	1441	1666	703
274	Methanosarcina acetivorans C2A	Finished	Methanosarcina acetivorans C2A	Broad Institute	638154508	Euryarchaeota	Methanomicrobia	Methanosarcinales	Methanosarcinaceae	Methanosarcina	Methanosarcina acetivorans	Yes	Hydrothermal vent	Marine sediment			6.5-7		Mesophile	5751492	4807	42.68	4721	86	10	3	3	0	3	0	2871	3451	992
275	Methanosarcina barkeri Fusaro, DSM 804	Finished	Methanosarcina barkeri fusaro	DOE Joint Genome Institute (JGI)	637000162	Euryarchaeota	Methanomicrobia	Methanosarcinales	Methanosarcinaceae	Methanosarcina	Methanosarcina barkeri	Yes	Mud	Mud samples from Lago del Fusaro Lake in Naples Italy	40.844	14.251			Mesophile	4873766	3830	39.23	3754	76	9	3	3	0	3	0	2325	2887	909
276	Methanosarcina flavescens E03.2	Permanent Draft	Methanosarcina flavescens E03.2	BioPara, Institute for general microbiology	2651869834	Euryarchaeota	Methanomicrobia	Methanosarcinales	Methanosarcinaceae	Methanosarcina	Methanosarcina flavescens	Yes		full-scale commercial biogas plant fed with maize silage, cattle manure and dry poultry feces						3256229	2904	41.31	2846	58	6	4	1	0	1	0	1777	2139	787
277	Methanosarcina horonobensis HB-1	Finished	Methanogenic archaea and the global carbon cycle UIUC	University of Illinois, Urbana-Champaign	2627854269	Euryarchaeota	Methanomicrobia	Methanosarcinales	Methanosarcinaceae	Methanosarcina	Methanosarcina horonobensis	Yes		deep subsurface groundwater from a Miocene Wakkanai Formation aquifer consisting of siliceous mudstone					Mesophile	5018607	4473	41.31	4399	74	9	3	3	0	3	0	2538	3166	946
278	Methanosarcina lacustris Z-7289	Finished	Methanogenic archaea and the global carbon cycle UIUC	University of Illinois, Urbana-Champaign	2630968805	Euryarchaeota	Methanomicrobia	Methanosarcinales	Methanosarcinaceae	Methanosarcina	Methanosarcina lacustris	Yes								4139808	3531	41.82	3458	73	9	3	3	0	3	0	2057	2526	791
279	Methanosarcina mazei Go1	Finished	Methanosarcina mazei Go1, DSM 3647	Integrated Genomics	638154509	Euryarchaeota	Methanomicrobia	Methanosarcinales	Methanosarcinaceae	Methanosarcina	Methanosarcina mazei	Yes	Sludge	sewage plant	51.532	9.927	5.5-8		Mesophile	4096345	3469	41.48	3398	71	10	4	3	0	3	0	2170	2621	841
280	Methanosarcina siciliae T4/M	Finished	Methanogenic archaea and the global carbon cycle UIUC	University of Illinois, Urbana-Champaign	2651869866	Euryarchaeota	Methanomicrobia	Methanosarcinales	Methanosarcinaceae	Methanosarcina	Methanosarcina siciliae	Yes	Sediment	Lake Sediment					Mesophile	5017558	4300	42.94	4220	80	9	3	3	0	3	0	2514	3089	959
281	Methanosarcina soligelidi SMA-21	Permanent Draft	Genomic basis of thermal adaption and carbon metabolism in permafrost isolates	DOE Joint Genome Institute (JGI)	2576861399	Euryarchaeota	Methanomicrobia	Methanosarcinales	Methanosarcinaceae	Methanosarcina	Methanosarcina soligelidi	Yes								4064496	3511	41.5	3439	72	9	3	3	0	3	0	2229	2639	838
282	Methanosarcina sp. 795 OTU795	Finished	Genome sequencing and assembly of microorganisms from an acetoclastic consortium	Agriculture and Agri-Food Canada	2681813367	Euryarchaeota	Methanomicrobia	Methanosarcinales	Methanosarcinaceae	Methanosarcina	Methanosarcina sp. 795	Yes								3122414	2776	41.31	2719	57	6	2	2	0	2	0	1722	2069	776
283	Methanosarcina sp. DSM 11855	Permanent Draft	The Hungate 1000. A catalogue of reference genomes from the rumen microbiome.	DOE Joint Genome Institute (JGI)	2595698250	Euryarchaeota	Methanomicrobia	Methanosarcinales	Methanosarcinaceae	Methanosarcina	Methanosarcina sp. DSM 11855	Yes		sheep rumen					Thermophile	3100602	2732	41.29	2658	74	12	3	4	0	5	0	1721	2043	766
284	Methanosarcina sp. Kolksee	Finished	Methanogenic archaea and the global carbon cycle UIUC	University of Illinois, Urbana-Champaign	2627853629	Euryarchaeota	Methanomicrobia	Methanosarcinales	Methanosarcinaceae	Methanosarcina	Methanosarcina sp. Kolksee	Yes								4553495	3809	39.85	3720	89	9	3	3	0	3	0	2267	2714	885
285	Methanosarcina sp. MTP4	Finished	Methanogenic archaea and the global carbon cycle UIUC	University of Illinois, Urbana-Champaign	2651869869	Euryarchaeota	Methanomicrobia	Methanosarcinales	Methanosarcinaceae	Methanosarcina	Methanosarcina sp. MTP4	Yes								4211468	3583	45.93	3509	74	9	3	3	0	3	0	2141	2558	847
286	Methanosarcina sp. WH1	Finished	Methanogenic archaea and the global carbon cycle UIUC	University of Illinois, Urbana-Champaign	2627853658	Euryarchaeota	Methanomicrobia	Methanosarcinales	Methanosarcinaceae	Methanosarcina	Methanosarcina sp. WH1	Yes								3914091	3520	41.82	3437	83	9	3	3	0	3	0	2059	2517	823
287	Methanosarcina sp. WWM596	Finished	Methanogenic archaea and the global carbon cycle UIUC	University of Illinois, Urbana-Champaign	2627853858	Euryarchaeota	Methanomicrobia	Methanosarcinales	Methanosarcinaceae	Methanosarcina	Methanosarcina sp. WWM596	Yes								4137337	3732	41.69	3652	80	9	3	3	0	3	0	2113	2617	836
288	Methanosarcina spelaei MC-15	Permanent Draft	Methanosarcina spelaei MC-15 genome sequencing	University of California, Santa Barbara	2791355116	Euryarchaeota	Methanomicrobia	Methanosarcinales	Methanosarcinaceae	Methanosarcina	Methanosarcina spelaei	Yes								5005272	4353	38.78	4276	77	4	2	1	0	1	0	2327	3004	851
289	Methanosarcina thermophila TM-1	Finished	Methanogenic archaea and the global carbon cycle UIUC	University of Illinois, Urbana-Champaign	2636415612	Euryarchaeota	Methanomicrobia	Methanosarcinales	Methanosarcinaceae	Methanosarcina	Methanosarcina thermophila	Yes	Fresh water	Thermophilic digester sludge; USA					Thermophile	3127379	2773	41.15	2701	72	9	3	3	0	3	0	1764	2085	770
290	Methanosarcina vacuolata Z-761	Finished	Methanogenic archaea and the global carbon cycle UIUC	University of Illinois, Urbana-Champaign	2648501188	Euryarchaeota	Methanomicrobia	Methanosarcinales	Methanosarcinaceae	Methanosarcina	Methanosarcina vacuolata	Yes	Sludge	sludge of a methane tank						4563885	3812	39.71	3725	87	9	3	3	0	3	0	2288	2749	876
291	Methanosphaera cuniculi 1R-7	Permanent Draft	Methanosphaera cuniculi 1R-7 genome sequencing	University of California, Santa Barbara	2802429591	Euryarchaeota	Methanobacteria	Methanobacteriales	Methanobacteriaceae	Methanosphaera	Methanosphaera cuniculi	Yes								1927090	1685	28.03	1647	38	1	1	0	0	0	0	1037	1167	552
292	Methanosphaera stadtmanae WGK6	Permanent Draft	Comparison of novel methanogens from Australian herbivores	454 Life Sciences	2595698213	Euryarchaeota	Methanobacteria	Methanobacteriales	Methanobacteriaceae	Methanosphaera	Methanosphaera stadtmanae	Yes	Gut	Australian herbivore gut (macropodid (Western Grey kangaroo) and ruminant (Brahman steer))	-31.9522	115.859	6.8		Mesophile	1729155	1643	27.7	1592	51	6	2	1	0	3	0	1067	1255	564
293	Methanosphaerula palustris E1-9c, DSM 19958	Finished	Candidatus Methanosphaerula palustris E1-9c	DOE Joint Genome Institute (JGI)	643348525	Euryarchaeota	Methanomicrobia	Methanomicrobiales	Methanoregulaceae	Methanosphaerula	Methanosphaerula palustris	Yes	Soil	Rich minerotrophic fen in central New York State			5.5		Mesophile	2922917	2859	55.35	2792	67	12	6	3	0	3	0	1676	2141	744
294	Methanospirillum hungatei JF-1	Finished	Methanogenic Syntropic Consortium	DOE Joint Genome Institute (JGI)	637000164	Euryarchaeota	Methanomicrobia	Methanomicrobiales	Methanospirillaceae	Methanospirillum	Methanospirillum hungatei	Yes	Sludge	Sewage sludge					Mesophile	3544738	3307	45.15	3239	68	14	6	4	0	4	0	1872	2553	825
295	Methanothermobacter defluvii DSM 7466	Permanent Draft	Genomic Encyclopedia of Type Strains, Phase IV (KMG-IV): sequencing the most valuable type-strain genomes for metagenomic binning, comparative biology and taxonomic classification	DOE Joint Genome Institute (JGI)	2757320366	Euryarchaeota	Methanobacteria	Methanobacteriales	Methanobacteriaceae	Methanothermobacter	Methanothermobacter defluvii	Yes	Sludge	sludge, metacrilic wastes digester					Thermophile	1709557	1813	49.5	1767	46	6	4	1	0	1	0	1340	1486	607
296	Methanothermobacter marburgensis Marburg DSM 2133	Finished	Methanothermobacter marburgensis Marburg DSM 2133	University of Gottingen	648028041	Euryarchaeota	Methanobacteria	Methanobacteriales	Methanobacteriaceae	Methanothermobacter	Methanothermobacter marburgensis	Yes	Sludge	anaerobic sewage sludge in Marburg, Germany	50.819	8.769			Thermophile	1639135	1806	48.64	1757	49	8	3	2	0	2	0	1263	1452	623
297	Methanothermobacter thermautotrophicus CaT2	Finished	Methanothermobacter thermautotrophicus CaT2 genome sequencing project	National Institute of Genetics, Japan	2627854017	Euryarchaeota	Methanobacteria	Methanobacteriales	Methanobacteriaceae	Methanothermobacter	Methanothermobacter sp. CaT2	Yes					6.0 - 8.0		Thermophile	1731018	1837	49.35	1788	49	7	3	2	0	2	0	1334	1501	621
298	Methanothermobacter thermautotrophicus Delta H	Finished	Methanothermobacter thermautotrophicus Delta H	Genome Therapeutics	638154510	Euryarchaeota	Methanobacteria	Methanobacteriales	Methanobacteriaceae	Methanothermobacter	Methanothermobacter thermautotrophicus	Yes	Sludge	Sewage sludge in 1971 in Urbana Illinois	40.1066	-88.1956			Thermophile	1751377	1893	49.54	1845	48	7	3	2	0	2	0	1332	1506	629
299	Methanothermobacter wolfeii SIV6	Finished	Complete genome sequence of Methanothermobacter wolfeii SIV6	Center for Biotechnology (CeBiTec), Bielefeld Univeristy	2728369540	Euryarchaeota	Methanobacteria	Methanobacteriales	Methanobacteriaceae	Methanothermobacter	Methanothermobacter wolfeii	Yes			52.02	8.65				1686891	1839	48.89	1790	49	8	4	2	0	2	0	1305	1487	604
300	Methanothermococcus okinawensis IH1	Finished	CSP_787660, Methanoarchaea	DOE Joint Genome Institute (JGI)	650716055	Euryarchaeota	Methanococci	Methanococcales	Methanococcaceae	Methanothermococcus	Methanothermococcus okinawensis	Yes	Deep sea	Deep-sea hydrothermal vent chimney at the Iheya Ridge in the Okinawa Trough Japan			4.5-8.5		Thermophile	1677455	1672	29.28	1626	46	7	3	2	0	2	0	1172	1332	583
301	Methanothermococcus thermolithotrophicus DSM 2095	Permanent Draft	Genomic Encyclopedia of Type Strains, Phase I: the one thousand microbial genomes (KMG-I) project	DOE Joint Genome Institute (JGI)	2519103186	Euryarchaeota	Methanococci	Methanococcales	Methanococcaceae	Methanothermococcus	Methanothermococcus thermolithotrophicus	Yes	Marine	Geothermally heated sea sediments	40.827	14.076	43990		Thermophile	1686930	1750	32.8	1705	45	4	1	2	0	1	0	1228	1420	661
302	Methanothermus fervidus V24S, DSM 2088	Finished	A Genomic Encyclopedia of Bacteria and Archaea (GEBA)	DOE Joint Genome Institute (JGI)	649633067	Euryarchaeota	Methanobacteria	Methanobacteriales	Methanothermaceae	Methanothermus	Methanothermus fervidus	Yes	Hot spring	Hot solfataric spring from Iceland					Hyperthermophile	1243342	1352	31.64	1303	49	6	2	2	0	2	0	1030	1147	565
303	Methanothrix harundinacea 6Ac	Finished	Methanosaeta harundinacea 6Ac	Chinese Academy of Science, Institute of Microbiology	2511231210	Euryarchaeota	Methanomicrobia	Methanosarcinales	Methanotrichaceae	Methanothrix	Methanosaeta harundinacea	Yes							Mesophile	2571034	2414	60.6	2371	43	4	1	1	0	1	0	1517	1839	726
304	Methanothrix soehngenii GP-6	Finished	Methanosaeta concilii GP-6	Clemson University	650716054	Euryarchaeota	Methanomicrobia	Methanosarcinales	Methanotrichaceae	Methanothrix	Methanothrix soehngenii	Yes	Fresh water	Sewage sludge, Ottawa, Canada	45.411	-75.698			Mesophile	3026645	2900	50.99	2850	50	6	2	2	0	2	0	1710	2139	741
305	Methanothrix thermoacetophila PT	Finished	Methanosaeta thermophila	DOE Joint Genome Institute (JGI)	639633038	Euryarchaeota	Methanomicrobia	Methanosarcinales	Methanotrichaceae	Methanothrix	Methanothrix thermoacetophila	Yes	Fresh water	sludge, thermophilic anaerobic digester					Thermophile	1879471	1785	53.55	1730	55	6	2	2	0	2	0	1232	1421	637
306	Methanotorris formicicus Mc-S-70	Permanent Draft	CSP_787660, Methanoarchaea	DOE Joint Genome Institute (JGI)	2506520039	Euryarchaeota	Methanococci	Methanococcales	Methanocaldococcaceae	Methanotorris	Methanotorris formicicus	Yes	Hydrothermal vent	Black smoker chimney at the Kairei field in the Central Indian Ridge, Indian Ocean			6-8.5		Thermophile	1945078	2121	32.45	2074	47	6	2	2	0	2	0	1339	1666	656
307	Methanotorris igneus Kol5, DSM 5666	Finished	CSP_787660, Methanoarchaea	DOE Joint Genome Institute (JGI)	650716056	Euryarchaeota	Methanococci	Methanococcales	Methanocaldococcaceae	Methanotorris	Methanotorris igneus	Yes	Marine	Shallow submarine vent system at the Kolbeinsey ridge Iceland	66.7802	-18.4808	6.5		Hyperthermophile	1854197	1843	32.3	1801	42	6	2	2	0	2	0	1313	1502	620
308	Methermicoccus shengliensis DSM 18856	Permanent Draft	Genomic Encyclopedia of Type Strains, Phase I: the one thousand microbial genomes (KMG-I) project	DOE Joint Genome Institute (JGI)	2565956510	Euryarchaeota	Methanomicrobia	Methanosarcinales	Methermicoccaceae	Methermicoccus	Methermicoccus shengliensis	Yes	Oil fields	Oil-production water			5.5-8		Thermophile	1513583	1666	54.66	1611	55	3	1	1	0	1	0	1207	1360	604
309	Natrialba aegyptia DSM 13077	Permanent Draft	Natrialba aegyptia DSM 13077	University of California, Davis	2531839261	Euryarchaeota	Halobacteria	Natrialbales	Natrialbaceae	Natrialba	Natrialba aegyptia	Yes	Soil	Hypersaline soil close to Aswan, Egypt	24.081	32.91	44020	Halophile	Mesophile	4618362	4451	61.98	4399	52	6	3	2	0	1	0	2432	2998	1027
310	Natrialba asiatica DSM 12278	Permanent Draft	Haloarchaeal genomes	University of California, Davis	2554235483	Euryarchaeota	Halobacteria	Natrialbales	Natrialbaceae	Natrialba	Natrialba asiatica	Yes		Beach sands with granular salts attached, Japan			6.6-7	Halophile	Mesophile	4404175	4224	62.39	4176	48	3	2	0	0	1	0	2359	2854	1002
311	Natrialba chahannaoensis JCM 10990	Permanent Draft	Haloarchaeal genomes	University of California, Davis	2554235476	Euryarchaeota	Halobacteria	Natrialbales	Natrialbaceae	Natrialba	Natrialba chahannaoensis	Yes	Sediment	Sediment from Chahannao soda lake, in Inner Mongolia Autonomous Region, China	41.446	113.873	9	Halophile	Mesophile	4309274	4078	60.42	4032	46	4	1	0	0	3	0	2109	2614	929
312	Natrialba hulunbeirensis JCM 10989	Permanent Draft	Natrialba hulunbeirensis JCM 10989	University of California, Davis	2531839260	Euryarchaeota	Halobacteria	Natrialbales	Natrialbaceae	Natrialba	Natrialba hulunbeirensis	Yes	Sediment	Sediment from a soda lake in Hulunbeir prefecture, Inner Mongolia Autonomous Region, China	49.221	119.765	9	Halophile	Mesophile	4159606	3897	61.73	3852	45	3	2	0	0	1	0	2159	2644	922
313	Natrialba magadii ATCC 43099	Permanent Draft	Haloarchaeal genomes	University of California, Davis	2554235492	Euryarchaeota	Halobacteria	Natrialbales	Natrialbaceae	Natrialba	Natrialba magadii	Yes	Fresh water	Lake Magadi in Kenya	-1.935	36.253		Halophile	Mesophile	4416299	4242	61.05	4196	46	2	1	0	0	1	0	2229	2771	970
314	Natrialba magadii ATCC 43099	Finished	CSP_788459, Alkaliphilic Haloarchaeon	DOE Joint Genome Institute (JGI)	646564555	Euryarchaeota	Halobacteria	Natrialbales	Natrialbaceae	Natrialba	Natrialba magadii	Yes	Fresh water	Lake Magadi in Kenya	-1.935	36.253		Halophile	Mesophile	4443643	4364	61.05	4304	60	12	5	3	0	4	0	2207	2785	963
315	Natrialba taiwanensis DSM 12281	Permanent Draft	Haloarchaeal genomes	University of California, Davis	2554235504	Euryarchaeota	Halobacteria	Natrialbales	Natrialbaceae	Natrialba	Natrialba taiwanensis	Yes		Solar salts, Taiwan	23.753	120.95	7.5-7.8	Halophile	Mesophile	4635192	4423	61.52	4374	49	3	2	0	0	1	0	2399	2972	1027
316	Natrinema altunense JCM 12890	Permanent Draft	Haloarchaeal genomes	University of California, Davis	2554235488	Euryarchaeota	Halobacteria	Natrialbales	Natrialbaceae	Natrinema	Natrinema altunense	Yes	Fresh water	Ayakekum salt lake in Altun Mountain, Xinjiang, China	37.044	88.997	7-7.7	Halophile	Mesophile	3774970	3785	64.55	3732	53	4	3	0	0	1	0	2012	2421	873
317	Natrinema gari JCM 14663	Permanent Draft	Haloarchaeal genomes	University of California, Davis	2554235484	Euryarchaeota	Halobacteria	Natrialbales	Natrialbaceae	Natrinema	Natrinema gari	Yes	Host	Anchovy fish sauce (nam-pla) produced in Thailand			6-6.5	Halophile	Mesophile	4023692	4115	63.72	4056	59	11	3	1	0	7	0	2012	2459	864
318	Natrinema pallidum DSM 3751	Permanent Draft	Natrinema pallidum DSM 3751	University of California, Davis	2529293001	Euryarchaeota	Halobacteria	Natrialbales	Natrialbaceae	Natrinema	Natrinema pallidum	Yes	Host	salted cod fish			7.2-7.6	Halophile	Mesophile	3915814	3898	63.72	3844	54	5	3	1	0	1	0	1955	2428	851
319	Natrinema pellirubrum 157	Finished	Completing the genomic survey of haloarchaeal genomes (revised), part 2	DOE Joint Genome Institute (JGI)	2509601048	Euryarchaeota	Halobacteria	Natrialbales	Natrialbaceae	Natrinema	Natrinema pellirubrum	Yes	Host	Red heat in salted hides (spoiled fish)	40.853	14.153	7.2-7.8	Halophile	Mesophile	4354100	4461	63.99	4403	58	10	4	3	0	3	0	2356	2859	913
320	Natrinema salaciae DSM 25055	Permanent Draft	Genomic Encyclopedia of Archaeal and Bacterial Type Strains, Phase II (KMG-II): from individual species to whole genera	DOE Joint Genome Institute (JGI)	2639762573	Euryarchaeota	Halobacteria	Natrialbales	Natrialbaceae	Natrinema	Natrinema salaciae	Yes		anoxic brine						4857017	4837	64.98	4776	61	9	4	1	0	4	0	2491	3063	998
321	Natrinema sp. J7-1	Permanent Draft	Natrinema sp. J7-1	Wuhan University	2563367005	Euryarchaeota	Halobacteria	Natrialbales	Natrialbaceae	Natrinema	Natrinema sp. J7-1	Yes								3667624	3814	64.38	3698	116	4	4	0	0	0	0	1980	2386	857
322	Natrinema sp. J7-2	Finished	Natrinema sp. J7-2	Nankai University	2517093029	Euryarchaeota	Halobacteria	Natrialbales	Natrialbaceae	Natrinema	Natrinema sp. J7-2	Yes								3793615	4360	64.11	4302	58	9	3	3	0	3	0	1995	2420	860
323	Natrinema versiforme JCM 10478	Permanent Draft	Haloarchaeal genomes	University of California, Davis	2554235502	Euryarchaeota	Halobacteria	Natrialbales	Natrialbaceae	Natrinema	Natrinema versiforme	Yes	Fresh water	Aibi salt lake, Xinjiang, China			6.5-7	Halophile	Mesophile	4190799	4211	63.96	4160	51	4	2	2	0	0	0	2265	2760	979
324	Natronoarchaeum philippinense DSM 27208	Permanent Draft	Genomic Encyclopedia of Archaeal and Bacterial Type Strains, Phase II (KMG-II): from individual species to whole genera	DOE Joint Genome Institute (JGI)	2728369221	Euryarchaeota	Halobacteria	Halobacteriales	Halobacteriaceae	Natronoarchaeum	Natronoarchaeum philippinense	Yes		commercial solar salt imported from the Philippines					Mesophile	3164179	3354	65.16	3302	52	3	1	1	0	1	0	1859	2215	772
325	Natronobacterium gregoryi SP2	Finished	Completing the genomic survey of haloarchaeal genomes (revised), part 2	DOE Joint Genome Institute (JGI)	2510461022	Euryarchaeota	Halobacteria	Natrialbales	Natrialbaceae	Natronobacterium	Natronobacterium gregoryi	Yes	Lake	Lake Magadi, Kenya	-1.9446	36.2522		Halophile	Mesophile	3788356	3841	62.24	3778	63	9	3	3	0	3	0	2077	2500	878
326	Natronobacterium texcoconense DSM 24767	Permanent Draft	Genomic Encyclopedia of Archaeal and Bacterial Type Strains, Phase II (KMG-II): from individual species to whole genera	DOE Joint Genome Institute (JGI)	2636416047	Euryarchaeota	Halobacteria	Natrialbales	Natrialbaceae	Natronobacterium	Natronobacterium texcoconense	Yes		saline-alkaline soil					Mesophile	4009868	4152	62.87	4088	64	5	2	2	0	1	0	2295	2771	917
327	Natronococcus amylolyticus DSM 10524	Permanent Draft	Haloarchaeal genomes	University of California, Davis	2554235477	Euryarchaeota	Halobacteria	Natrialbales	Natrialbaceae	Natronococcus	Natronococcus amylolyticus	Yes	Soil	Soil from shores of the Lake Magadi, Kenya	-1.9446	36.2522	9	Halophile	Mesophile	4416525	4368	64.36	4318	50	4	2	1	0	1	0	2440	3011	1018
328	Natronococcus jeotgali DSM 18795	Permanent Draft	Haloarchaeal genomes	University of California, Davis	2554235493	Euryarchaeota	Halobacteria	Natrialbales	Natrialbaceae	Natronococcus	Natronococcus jeotgali	Yes		Shrimp jeotgal (traditional Korean fermented seafood)			7.5	Halophile	Mesophile	4496185	4470	64.41	4417	53	2	0	0	0	2	0	2371	2953	987
329	Natronococcus occultus SP4, DSM 3396	Finished	A Genomic Encyclopedia of Bacteria and Archaea (GEBA)	DOE Joint Genome Institute (JGI)	2506520044	Euryarchaeota	Halobacteria	Natrialbales	Natrialbaceae	Natronococcus	Natronococcus occultus	Yes	Aquatic	Soda lake Lake Magadi	-1.944	36.252	9.5	Halophile	Mesophile	4314118	4376	64.66	4305	71	13	5	4	0	4	0	2432	2949	1007
330	Natronolimnobius aegyptiacus JW/NM-HA 15	Finished	Natrialbaceae archaeon JW/NM-HA 15	Chinese Academy of Agricultural Sciences	2718217640	Euryarchaeota	Halobacteria	Natrialbales	Natrialbaceae	Natronolimnobius	Natronolimnobius aegyptiacus	Yes	Soil							3930546	3698	64.11	3642	56	6	2	2	0	2	0	2153	2580	948
331	Natronolimnobius innermongolicus JCM 12255	Permanent Draft	Natronolimnobius innermongolicus JCM 12255	University of California, Davis	2529293002	Euryarchaeota	Halobacteria	Natrialbales	Natrialbaceae	Natronolimnobius	Natronolimnobius innermongolicus	Yes	Fresh water	Soda lake in Inner Mongolia Autonomous Region, China			9-9.5	Halophile	Mesophile	4588634	4449	64.29	4401	48	3	1	0	0	2	0	2430	3007	998
332	Natronomonas moolapensis 8.8.11, DSM 18674	Finished	Natronomonas moolapensis 8.8.11, DSM 18674	Max Planck Institute	2540341082	Euryarchaeota	Halobacteria	Halobacteriales	Haloarculaceae	Natronomonas	Natronomonas moolapensis	Yes	Ponds	Saltern crystallizer pond, Australia on March 2002	-38.0098	144.025		Halophile	Mesophile	2912573	2799	64.53	2749	50	3	1	1	0	1	0	1673	1986	752
333	Natronomonas pharaonis Gabara, DSM 2160	Finished	Natronomonas pharaonis Gabara, DSM 2160	Max Planck Institute	637000187	Euryarchaeota	Halobacteria	Halobacteriales	Haloarculaceae	Natronomonas	Natronomonas pharaonis	Yes	Fresh water	Lake Gabara Egypt			8.5	Halophile	Mesophile	2749696	2895	63.12	2843	52	3	1	1	0	1	0	1673	2010	809
334	Natronorubrum bangense JCM 10635	Permanent Draft	Haloarchaeal genomes	University of California, Davis	2554235474	Euryarchaeota	Halobacteria	Natrialbales	Natrialbaceae	Natronorubrum	Natronorubrum bangense	Yes	Sediment	Sediment of the Bange salt-alkaline lake in Tibet	31.911	79.173	9-9.5	Halophile	Mesophile	4111275	4030	60.39	3981	49	2	2	0	0	0	0	2197	2689	950
335	Natronorubrum sediminis CGMCC 1.8981	Permanent Draft	Genomic Encyclopedia of Type Strains, Phase III (KMG-III): the genomes of soil and plant-associated and newly described type strains	DOE Joint Genome Institute (JGI)	2617270925	Euryarchaeota	Halobacteria	Natrialbales	Natrialbaceae	Natronorubrum	Natronorubrum sediminis	Yes								3782545	3738	61.1	3676	62	12	4	4	0	4	0	2223	2594	922
336	Natronorubrum sulfidifaciens JCM 14089	Permanent Draft	Haloarchaeal genomes	University of California, Davis	2554235497	Euryarchaeota	Halobacteria	Natrialbales	Natrialbaceae	Natronorubrum	Natronorubrum sulfidifaciens	Yes	Fresh water	Aiding salt lake in Xin-Jiang, China	44.568	87.751	8.7-9.2	Halophile	Mesophile	3460288	3474	61.78	3428	46	3	2	0	0	1	0	1952	2348	850
337	Natronorubrum texcoconense DSM 25211	Permanent Draft	Genomic Encyclopedia of Archaeal and Bacterial Type Strains, Phase II (KMG-II): from individual species to whole genera	DOE Joint Genome Institute (JGI)	2636416021	Euryarchaeota	Halobacteria	Natrialbales	Natrialbaceae	Natronorubrum	Natronorubrum texcoconense	Yes								4641793	4573	63.55	4516	57	6	3	3	0	0	0	2540	3096	1041
338	Natronorubrum thiooxidans HArc-T	Permanent Draft	Genome sequencing of 100 strains of the haloalkaliphilic chemolithoautotrophic sulfur-oxidizing bacterium Thioalkalivibrio	DOE Joint Genome Institute (JGI)	2681812919	Euryarchaeota	Halobacteria	Natrialbales	Natrialbaceae	Natronorubrum	Natronorubrum thiooxidans	Yes		hypersaline lake brines	52.2667	79.5				4209793	4345	60.95	4237	108	11	9	1	0	1	0	2344	2842	958
339	Natronorubrum tibetense DSM 13204	Permanent Draft	Completing the genomic survey of haloarchaeal genomes (revised), part 2	DOE Joint Genome Institute (JGI)	2517287024	Euryarchaeota	Halobacteria	Natrialbales	Natrialbaceae	Natronorubrum	Natronorubrum tibetense	Yes	Sediment	Sediment of the Bange salt-alkaline lake in Tibet	31.392	90.009	9.0 - 9.5	Halophile	Mesophile	4934841	4867	62.25	4801	66	10	3	3	0	4	0	2606	3160	1061
340	Nitrosocosmicus oleophilus MY3	Finished	Nitrosocosmicus oleophilus MY3 Genome sequencing	Chungbuk National University	2657244923	Thaumarchaeota	Nitrososphaeria	Nitrososphaerales	Nitrososphaeraceae	Candidatus Nitrosocosmicus	Candidatus Nitrosocosmicus oleophilus	Yes								3430706	3767	34.14	3722	45	7	1	3	0	3	0	1372	1848	641
341	Nitrosopumilus maritimus SCM1	Finished	Nitrosopumilus maritimus	DOE Joint Genome Institute (JGI)	641228499	Thaumarchaeota	unclassified	Nitrosopumilales	Nitrosopumilaceae	Nitrosopumilus	Nitrosopumilus maritimus	Yes	Sea water	gravel from a tropical marine tank at the Seattle Aquarium	47.6075	-122.343			Mesophile	1645259	1842	34.17	1797	45	4	1	1	0	1	0	956	1217	571
342	Nitrosotalea okcheonensis CS NCS1	Finished	Comparative genomics of Nitrosotalea	University of Vienna	2775506851	Thaumarchaeota	unclassified	unclassified	unclassified	Candidatus Nitrosotalea	Candidatus Nitrosotalea okcheonensis	Yes								1972585	2348	37.47	2301	47	3	1	1	0	1	0	1088	1371	577
343	Palaeococcus ferrophilus DMJ, DSM 13482	Permanent Draft	A Genomic Encyclopedia of Bacteria and Archaea (GEBA)	DOE Joint Genome Institute (JGI)	2501025505	Euryarchaeota	Thermococci	Thermococcales	Thermococcaceae	Palaeococcus	Palaeococcus ferrophilus	Yes	Deep sea	deep-sea hydrothermal vent chimney at the Myojin Knoll in the Ogasawara-Bonin Arc, Japan			6		Hyperthermophile	2206431	2399	54.31	2351	48	1	0	1	0	0	0	1493	1747	555
344	Palaeococcus pacificus DY20341	Finished	Palaeococcus pacificus DY20341	Third Institute of Oceanography, State Oceanic Administration	2588253738	Euryarchaeota	Thermococci	Thermococcales	Thermococcaceae	Palaeococcus	Palaeococcus pacificus	Yes	Deep sea	Isolated from Deep-Sea Hydrothermal Sediments	-1.5	-102.75		Halophile	Hyperthermophile	1859370	2044	43.04	1991	53	6	2	2	0	2	0	1431	1608	565
345	Picrophilus oshimae DSM 9789	Permanent Draft	Genomic Encyclopedia of Type Strains, Phase I: the one thousand microbial genomes (KMG-I) project	DOE Joint Genome Institute (JGI)	2579779151	Euryarchaeota	Thermoplasmata	Thermoplasmatales	Picrophilaceae	Picrophilus	Picrophilus oshimae	Yes	Aquatic	Solfataric spring	43.643	144.439	0-3.5		Thermophile	1534155	1623	35.98	1571	52	3	1	1	0	1	0	1136	1248	618
346	Picrophilus torridus DSM 9790	Finished	Picrophilus torridus DSM 9790	ANRT, Technical University of Hamburg, University of Gottingen	638154512	Euryarchaeota	Thermoplasmata	Thermoplasmatales	Picrophilaceae	Picrophilus	Picrophilus torridus	Yes	Soil	solfataric field			0.7		Thermophile	1545895	1605	35.97	1551	54	3	1	1	0	1	0	1111	1252	620
347	Pyrobaculum aerophilum IM2	Finished	Pyrobaculum aerophilum IM2	California Institute of Technology, University of California, Los Angeles	638154513	Crenarchaeota	Thermoprotei	Thermoproteales	Thermoproteaceae	Pyrobaculum	Pyrobaculum aerophilum	Yes	Hydrothermal vent	Boiling marine water hole in Maronti Beach, Ischia, Italy	40.735	13.948	7		Hyperthermophile	2222430	2625	51.36	2575	50	3	1	1	0	1	0	1375	1649	645
348	Pyrobaculum arsenaticum PZ6, DSM 13514	Finished	Pyrobaculum genomes	DOE Joint Genome Institute (JGI)	640427135	Crenarchaeota	Thermoprotei	Thermoproteales	Thermoproteaceae	Pyrobaculum	Pyrobaculum arsenaticum	Yes	Hot spring	Hot spring at Pisciarelli Solfatara Naples Italy	40.829	14.13			Hyperthermophile	2121076	2410	55.05	2363	47	3	1	1	0	1	0	1347	1593	659
349	Pyrobaculum calidifontis JCM 11548	Finished	Pyrobaculum genomes	DOE Joint Genome Institute (JGI)	640069326	Crenarchaeota	Thermoprotei	Thermoproteales	Thermoproteaceae	Pyrobaculum	Pyrobaculum calidifontis	Yes	Hot spring	Terrestrial hot spring in the Philippines	14.2359	121.166			Hyperthermophile	2009313	2213	57.15	2184	29	3	1	1	0	1	0	1282	1496	635
350	Pyrobaculum ferrireducens 1860	Finished	Pyrobaculum ferrireducens 1860	Russian Academy of Science, Centre Bioengineering	2511231117	Crenarchaeota	Thermoprotei	Thermoproteales	Thermoproteaceae	Pyrobaculum	Pyrobaculum ferrireducens	Yes	Extreme	Lake Fumarolic in the Uzon Caldera	54.5	159.97			Hyperthermophile	2467972	2858	56.97	2824	34	3	1	1	0	1	0	1423	1650	679
351	Pyrobaculum islandicum DSM 4184	Finished	Pyrobaculum genomes	DOE Joint Genome Institute (JGI)	639633053	Crenarchaeota	Thermoprotei	Thermoproteales	Thermoproteaceae	Pyrobaculum	Pyrobaculum islandicum	Yes	Fresh water	Water from a geothermal power plant in Iceland					Hyperthermophile	1826402	2063	49.6	2014	49	3	1	1	0	1	0	1182	1388	598
352	Pyrobaculum neutrophilum V24Sta	Finished	Pyrobaculum genomes	DOE Joint Genome Institute (JGI)	641522657	Crenarchaeota	Thermoprotei	Thermoproteales	Thermoproteaceae	Pyrobaculum	Pyrobaculum neutrophilum	Yes	Hot spring	Hot spring in Iceland					Hyperthermophile	1769823	2053	59.91	2006	47	3	1	1	0	0	0	1184	1363	593
353	Pyrobaculum sp. WP30	Finished	Pyrobaculum sp. WP30 Genome sequencing	Montana State University	2636415462	Crenarchaeota	Thermoprotei	Thermoproteales	Thermoproteaceae	Pyrobaculum	Pyrobaculum sp. WP30	Yes	Hot spring	Hot spring from Yellowstone National Park						1993257	2303	58.31	2268	35	3	1	1	0	1	0	1228	1449	615
354	Pyrococcus abyssi GE5	Finished	Pyrococcus abyssi GE5	CEA Genoscope	638154514	Euryarchaeota	Thermococci	Thermococcales	Thermococcaceae	Pyrococcus	Pyrococcus abyssi	Yes	Deep sea	Active chimney in the North Fiji Basin of the Pacific Ocean at a depth of 3500m					Hyperthermophile	1768562	2051	44.71	1904	147	5	2	1	0	1	0	1401	1550	568
355	Pyrococcus furiosus DSM 3638	Finished	Pyrococcus furiosus DSM 3638	University of Maryland, University of Utah	638154515	Euryarchaeota	Thermococci	Thermococcales	Thermococcaceae	Pyrococcus	Pyrococcus furiosus	Yes	Marine	Geothermally heated marine sediment, at shallow marine solfataric region at Vulcano Island Italy	38.396	14.968	43960		Hyperthermophile	1908256	2179	40.77	2069	110	4	2	1	0	1	0	1445	1655	618
356	Pyrococcus kukulkanii NCB100	Finished	Pyrococcus kukulkanii NCB100 genome sequencing	Ecole Normale Superieure de Lyon	2687453501	Euryarchaeota	Thermococci	Thermococcales	Thermococcaceae	Pyrococcus	Pyrococcus kukulkanii	Yes		Isolated by cultivation in SME medium under anaerobic conditions at 100C from a black smoker chimney fragment						1977126	2321	44.62	2195	126	4	2	1	0	1	0	1449	1667	519
357	Pyrococcus sp. NA2	Finished	Pyrococcus sp. NA2	Korea Institute of Ocean Science and Technology (KIOST)	650716079	Euryarchaeota	Thermococci	Thermococcales	Thermococcaceae	Pyrococcus	Pyrococcus sp. NA2	Yes	Hot spring	hydrothermal vent area			43960		Hyperthermophile	1861320	2029	42.74	1980	49	4	2	1	0	1	0	1416	1562	576
358	Pyrococcus sp. ST04	Finished	Pyrococcus sp. ST04	Kyunghee University	2521172719	Euryarchaeota	Thermococci	Thermococcales	Thermococcaceae	Pyrococcus	Pyrococcus sp. ST04	Yes	Hot spring	deep-sea hydrothermal sulfide chimney on the Endeavour Segment of the Juan de Fuca Ridge in the northeastern Pacific Ocean						1736885	1798	42.29	1748	50	4	2	1	0	1	0	1328	1483	577
359	Pyrococcus yayanosii CH1	Finished	Pyrococcus yayanosii CH1	Shanghai Jiao Tong University	650716080	Euryarchaeota	Thermococci	Thermococcales	Thermococcaceae	Pyrococcus	Pyrococcus yayanosii	Yes	Hot spring	deep sea hydrothermal site ?Ashadze? on the mid-Atlantic ridge at a depth of 4100 m	12.967	-44.852			Hyperthermophile	1716818	1915	51.64	1865	50	4	2	1	0	1	0	1266	1436	520
360	Pyrodictium delaneyi hulk	Finished	Pyrodictium delaneyi hulk genome sequencing	Michigan State University	2811995048	Crenarchaeota	Thermoprotei	Desulfurococcales	Pyrodictiaceae	Pyrodictium	Pyrodictium delaneyi	Yes	Hydrothermal sediment	Juan de Fuca Ridge: Hulk sulfide mound	47	-129				2042801	2150	53.88	2098	52	4	2	1	0	1	0	1234	1428	576
361	Pyrodictium occultum PL-19 1	Permanent Draft	Pyrodictium occultum PL-19	Oak Ridge National Laboratory	2728369542	Crenarchaeota	Thermoprotei	Desulfurococcales	Pyrodictiaceae	Pyrodictium	Pyrodictium occultum	Yes		Submarine solfataric field	38.3932	14.9679			Thermophile	1621727	1727	63.5	1678	49	4	2	1	0	1	0	1060	1212	552
362	Pyrolobus fumarii 1A, DSM 11204	Finished	A Genomic Encyclopedia of Bacteria and Archaea (GEBA)	DOE Joint Genome Institute (JGI)	2505679005	Crenarchaeota	Thermoprotei	Desulfurococcales	Pyrodictiaceae	Pyrolobus	Pyrolobus fumarii	Yes	Deep sea	Hydrothermally heated black smoker wall at the TAG site at the Mid Atlantic Ridge (depth 3650 meters)			5.5		Hyperthermophile	1843267	2038	54.9	1986	52	3	1	1	0	1	0	1116	1326	531
363	Saccharolobus solfataricus P2	Finished	Sulfolobus solfataricus P2	ANRT, European Union (EU)	638154518	Crenarchaeota	Thermoprotei	Sulfolobales	Sulfolobaceae	Saccharolobus	Saccharolobus solfataricus	Yes	Hot spring	volcanic hot spring	40.8333	14.15	2-4.5		Hyperthermophile	2992245	3141	35.79	3048	93	5	2	1	0	1	0	1896	2269	753
364	Salinarchaeum sp. Harcht-Bsk1	Finished	Salinarchaeum sp. Harcht-Bsk1 Genome sequencing	Baltic Federal University	2597489945	Euryarchaeota	Halobacteria	Natrialbales	Natrialbaceae	Salinarchaeum	Salinarchaeum sp. Harcht-Bsk1	Yes		Top aerobic sediment layer of hypersaline chloride-sulfate lake	48.1908	46.9332			Mesophile	3255260	3139	66.59	3089	50	3	1	1	0	1	0	1816	2197	761
365	Salinigranum rubrum GX10	Finished	Salinigranum rubrum GX10 genome sequencing	Zhejiang University	2788499920	Euryarchaeota	Halobacteria	Haloferacales	Halorubraceae	Salinigranum	Salinigranum rubrum	Yes		marine solar saltern brine						4973118	5245	65.67	5188	57	6	2	2	0	2	0	2565	3372	1018
366	Staphylothermus hellenicus P8, DSM 12710	Finished	Comparative genomics of the Archaea	DOE Joint Genome Institute (JGI)	646564573	Crenarchaeota	Thermoprotei	Desulfurococcales	Desulfurococcaceae	Staphylothermus	Staphylothermus hellenicus	Yes	Hot spring	Shallow hydrothermal vents off Palaeochori Bay, Milos, Greece	36.674	24.517	6		Hyperthermophile	1580347	1716	36.84	1668	48	3	1	1	0	1	0	960	1152	450
367	Staphylothermus marinus F1, DSM 3639	Finished	Diverse archaeal organisms	DOE Joint Genome Institute (JGI)	640069332	Crenarchaeota	Thermoprotei	Desulfurococcales	Desulfurococcaceae	Staphylothermus	Staphylothermus marinus	Yes	Hot spring	Hydrothermal marine sediment from Vulcano Island in Italy	38.3913	14.968			Hyperthermophile	1570485	1659	35.73	1610	49	3	1	1	0	1	0	990	1169	446
368	Sulfodiicoccus acidiphilus HS-1	Finished	Sulfodiicoccus acidiphilus HS-1 Genome sequencing	Macrogen Inc	2788499800	Crenarchaeota	Thermoprotei	Sulfolobales	Sulfolobaceae	Sulfodiicoccus	Sulfodiicoccus acidiphilus	Yes	Hot spring	Acidic hot spring			1.4		Thermophile	2353191	2612	51.15	2531	81	3	1	1	0	1	0	1361	1710	623
369	Sulfolobus acidocaldarius 98-3, DSM 639	Finished	Sulfolobus acidocaldarius 98-3, DSM 639	Epidauros Biotechnologie AG	638154517	Crenarchaeota	Thermoprotei	Sulfolobales	Sulfolobaceae	Sulfolobus	Sulfolobus acidocaldarius	Yes	Hot spring	acid hot spring	44.6633	-110.493	43836		Thermophile	2225959	2343	36.71	2285	58	3	1	1	0	1	0	1423	1662	670
370	Sulfolobus islandicus M.14.25	Finished	LGT in Sulfolobus islandicus	DOE Joint Genome Institute (JGI)	643692045	Crenarchaeota	Thermoprotei	Sulfolobales	Sulfolobaceae	Sulfolobus	Sulfolobus islandicus	Yes	Hot spring	Hot spring on the Kamchatka Penninsula in the Russian Far East	52.4579	158.196	2		Hyperthermophile	2608832	2900	35.1	2853	47	3	1	1	0	1	0	1691	1992	701
371	Sulfolobus sp. A20	Finished	Sulfolobus sp. A20 Genome sequencing	Institute of Microbiology, Chinese Academy of Sciences	2728369534	Crenarchaeota	Thermoprotei	Sulfolobales	Sulfolobaceae	Sulfolobus	Sulfolobus sp. A20	Yes		hot spring						2688317	2767	34.78	2701	66	3	1	1	0	1	0	1709	1950	730
372	Sulfurisphaera ohwakuensis DSM 12421	Permanent Draft	Genomic Encyclopedia of Type Strains, Phase IV (KMG-IV): sequencing the most valuable type-strain genomes for metagenomic binning, comparative biology and taxonomic classification	DOE Joint Genome Institute (JGI)	2861352127	Crenarchaeota	Thermoprotei	Sulfolobales	Sulfolobaceae	Sulfurisphaera	Sulfurisphaera ohwakuensis	Yes		culture of DSM 12421						2722575	3079	32.53	3022	57	3	1	1	0	1	0	2146	1991	675
373	Sulfurisphaera tokodaii 7	Finished	Sulfolobus tokodaii 7, JCM 10545	National Institute of Technology and Evaluation	638154519	Crenarchaeota	Thermoprotei	Sulfolobales	Sulfolobaceae	Sulfurisphaera	Sulfurisphaera tokodaii	Yes	Fresh water	Beppu Hot Springs in the geothermal area of Kyushu Island Japan	32.9667	131.033	2.5-3		Hyperthermophile	2694756	2982	32.79	2915	67	3	1	1	0	1	0	1580	1989	679
374	Thaumarchaeota archaeon MY2	Permanent Draft	Thaumarchaeota archaeon MY2 Genome sequencing	Chungbuk National University	2579779048	Thaumarchaeota	unclassified	unclassified	unclassified	Candidatus Nitrosotenuis	Candidatus Nitrosotenuis chungbukensis	Yes		Soil						1762971	2069	41.76	2024	45	3	1	1	0	1	0	1051	1317	596
375	Thaumarchaeota archaeon N4	Permanent Draft	Candidatus Nitrosotenuis uzonensis	CEA Genoscope	2619619229	Thaumarchaeota	unclassified	unclassified	unclassified	Candidatus Nitrosotenuis	Candidatus Nitrosotenuis uzonensis	Yes								1636125	1955	42.25	1909	46	3	1	1	0	1	0	1006	1247	574
376	Thaumarchaeota archaeon SAT1	Finished	Thaumarchaeota archaeon SAT1 Genome sequencing	Tsinghua University	2630968650	Thaumarchaeota	unclassified	unclassified	unclassified	Candidatus Nitrosotenuis	Candidatus Nitrosotenuis cloacae	Yes								1620156	1924	41	1876	48	3	1	1	0	1	0	998	1223	574
377	Thermococcus barophilus MP, DSM 11836	Finished	Thermococcus barophilus MP, DSM 11836	J. Craig Venter Institute (JCVI)	650716096	Euryarchaeota	Thermococci	Thermococcales	Thermococcaceae	Thermococcus	Thermococcus barophilus	Yes	Deep sea	Chimney wall, Mid-Atlantic Ridge, Snakepit	23.2241	-44.565			Hyperthermophile	2064237	2315	41.67	2265	50	4	2	1	0	1	0	1514	1743	572
378	Thermococcus barossii SHCK-94	Finished	Thermococcales genome sequencing	Ecole Normale Superieure de Lyon	2758568026	Euryarchaeota	Thermococci	Thermococcales	Thermococcaceae	Thermococcus	Thermococcus barossii	Yes								1922421	2114	54.69	2033	81	4	2	1	0	1	0	1399	1578	526
379	Thermococcus celer Vu 13	Finished	Thermococcales genome sequencing	Ecole Normale Superieure de Lyon	2773857858	Euryarchaeota	Thermococci	Thermococcales	Thermococcaceae	Thermococcus	Thermococcus celer	Yes								1866819	2057	56.45	1984	73	4	2	1	0	1	0	1361	1560	549
380	Thermococcus celericrescens DSM 17994	Permanent Draft	Thermococcus celericrescens DSM 17994 genome sequencing	Kyungpook National University, Shin's Lab.	2684622662	Euryarchaeota	Thermococci	Thermococcales	Thermococcaceae	Thermococcus	Thermococcus celericrescens	Yes	Hot spring	hot water emitted from a casing pipe driven into a hydrothermal site					Thermophile	2330548	2703	54.31	2600	103	4	2	1	0	1	0	1494	1851	590
381	Thermococcus chitonophagus GC74	Finished	Thermococcales genome sequencing	Ecole Normale Superieure de Lyon	2758568020	Euryarchaeota	Thermococci	Thermococcales	Thermococcaceae	Thermococcus	Thermococcus chitonophagus	Yes			20.83	-109.1				1961979	2283	44.92	2162	121	4	2	1	0	1	0	1466	1681	578
382	Thermococcus cleftensis CL1	Finished	Thermococcus cleftensis CL1	Kyunghee University	2518645553	Euryarchaeota	Thermococci	Thermococcales	Thermococcaceae	Thermococcus	Thermococcus cleftensis	Yes	Hot spring	deep-sea hydrothermal sulfide chimney on the Cleft Segment of the Juan de Fuca Ridge in the northeastern Pacific Ocean	46.0265	-130.057	6.7		Hyperthermophile	1950313	2067	55.82	2017	50	4	2	1	0	1	0	1350	1533	511
383	Thermococcus eurythermalis A501	Finished	Thermococcus eurythermalis A501 Genome sequencing	Laboratory of Marine Oceanography	2636415503	Euryarchaeota	Thermococci	Thermococcales	Thermococcaceae	Thermococcus	Thermococcus eurythermalis	Yes								2126164	2371	53.45	2268	103	4	2	1	0	1	0	1441	1663	531
384	Thermococcus gammatolerans EJ3	Finished	Thermococcus gammatolerans EJ3	CEA Genoscope	644736411	Euryarchaeota	Thermococci	Thermococcales	Thermococcaceae	Thermococcus	Thermococcus gammatolerans	Yes	Hot spring	hydrothermal vent chimneys located in the mid-Atlantic Ridge and Guyamas basin.			5.8-9		Hyperthermophile	2045438	2206	53.56	2156	50	4	2	1	0	1	0	1392	1628	558
385	Thermococcus gorgonarius W-12	Finished	Thermococcales genome sequencing	Ecole Normale Superieure de Lyon	2758568023	Euryarchaeota	Thermococci	Thermococcales	Thermococcaceae	Thermococcus	Thermococcus gorgonarius	Yes								1674122	1947	51.67	1859	88	4	2	1	0	1	0	1282	1448	465
386	Thermococcus guaymasensis DSM 11113	Finished	Thermococcus guaymasensis DSM 11113	University of Waterloo	2681812990	Euryarchaeota	Thermococci	Thermococcales	Thermococcaceae	Thermococcus	Thermococcus guaymasensis	Yes	Hot spring	hydrothermal vent site (2000 m)	27.25	-111.5				1920914	2209	52.86	2100	109	4	2	1	0	1	0	1386	1589	511
387	Thermococcus kodakarensis KOD1	Finished	Thermococcus kodakarensis KOD1	ANRT, Kyoto University	638154520	Euryarchaeota	Thermococci	Thermococcales	Thermococcaceae	Thermococcus	Thermococcus kodakarensis	Yes	Hydrothermal vent	Solfatara on Kodakara Island Kagoshima, Japan	31.5966	130.557	5.8		Hyperthermophile	2088737	2428	52	2297	131	8	4	1	0	1	0	1432	1688	581
388	Thermococcus litoralis DSM 5473	Finished	Thermococcus litoralis DSM 5473	New England Biolabs	2513237398	Euryarchaeota	Thermococci	Thermococcales	Thermococcaceae	Thermococcus	Thermococcus litoralis	Yes	Hot spring	Shallow submarine hot spring near Lucrino, the Bay of Naples, Italy	40.84	14.25			Hyperthermophile	2309423	2555	43.06	2507	48	3	2	1	0	0	0	1633	1917	638
389	Thermococcus onnurineus NA1	Finished	Thermococcus onnurineus NA1	Korea Institute of Ocean Science and Technology (KIOST)	643348580	Euryarchaeota	Thermococci	Thermococcales	Thermococcaceae	Thermococcus	Thermococcus onnurineus	Yes	Hot spring	PACMANUS hydrothermal vent sediment at a depth of 1650 meters			8.5		Hyperthermophile	1847607	2027	51.27	1976	51	5	1	1	0	1	0	1337	1555	555
390	Thermococcus pacificus P-4	Finished	Thermococcales genome sequencing	Ecole Normale Superieure de Lyon	2758568025	Euryarchaeota	Thermococci	Thermococcales	Thermococcaceae	Thermococcus	Thermococcus pacificus	Yes								1785673	2034	54.24	1948	86	4	2	1	0	1	0	1342	1520	513
391	Thermococcus paralvinellae ES1	Finished	Thermococcus paralvinellae ES1	Kyunghee University	2558860254	Euryarchaeota	Thermococci	Thermococcales	Thermococcaceae	Thermococcus	Thermococcus paralvinellae	Yes								1957742	2066	40.3	2016	50	4	2	1	0	1	0	1472	1677	586
392	Thermococcus peptonophilus OG-1	Finished	Thermococcales genome sequencing	Ecole Normale Superieure de Lyon	2687453162	Euryarchaeota	Thermococci	Thermococcales	Thermococcaceae	Thermococcus	Thermococcus peptonophilus	Yes			28.57	140.63				1896106	2145	51.74	2050	95	4	2	1	0	1	0	1385	1596	523
393	Thermococcus profundus DT 5432	Finished	Thermococcales genome sequencing	Ecole Normale Superieure de Lyon	2758568027	Euryarchaeota	Thermococci	Thermococcales	Thermococcaceae	Thermococcus	Thermococcus profundus	Yes			27.55	126.97				2043143	2205	53.09	2126	79	4	2	1	0	1	0	1430	1624	537
394	Thermococcus radiotolerans EJ2	Finished	Thermococcales genome sequencing	Ecole Normale Superieure de Lyon	2758568021	Euryarchaeota	Thermococci	Thermococcales	Thermococcaceae	Thermococcus	Thermococcus radiotolerans	Yes			27.01	-111.4				1868990	2099	55.6	2018	81	4	2	1	0	1	0	1430	1603	531
395	Thermococcus sibiricus MM 739	Finished	Thermococcus sibiricus MM 739	Russian Academy of Science, Centre Bioengineering	644736412	Euryarchaeota	Thermococci	Thermococcales	Thermococcaceae	Thermococcus	Thermococcus sibiricus	Yes	Hot spring	well of the never flooded oil-bearing Jurassic horizon of a high temperature Samoltor oil reservoir; Russia, Western Siberia			5.8-9		Hyperthermophile	1845800	2085	40.2	2035	50	4	2	1	0	1	0	1368	1597	552
396	Thermococcus siculi RG-20	Finished	Thermococcales genome sequencing	Ecole Normale Superieure de Lyon	2758568024	Euryarchaeota	Thermococci	Thermococcales	Thermococcaceae	Thermococcus	Thermococcus siculi	Yes			27.55	126.97				2029167	2209	54.99	2133	76	3	1	1	0	1	0	1437	1627	497
397	Thermococcus sp. 2319x1	Finished	Thermococcus sp. 2319x1 Genome sequencing and assembly	Hotzyme, University of Copenhagen	2684622610	Euryarchaeota	Thermococci	Thermococcales	Thermococcaceae	Thermococcus	Thermococcus sp. 2319x1	Yes								1961221	2254	44.6	2168	86	4	2	1	0	1	0	1410	1645	578
398	Thermococcus sp. 4557	Finished	Thermococcus sp. 4557	Beijing Genomics Institute (BGI)	650716097	Euryarchaeota	Thermococci	Thermococcales	Thermococcaceae	Thermococcus	Thermococcus sp. 4557	Yes	Hot spring	Deep-Sea Hydrothermal Vent Guaymas Basin site in the Gulf of California	27.25	-111.5			Hyperthermophile	2011320	2181	56.08	2133	48	4	2	1	0	1	0	1419	1619	519
399	Thermococcus sp. 5-4	Finished	Genome sequencing of Thermococcus sp. 5-4	CEA Genoscope	2758568028	Euryarchaeota	Thermococci	Thermococcales	Thermococcaceae	Thermococcus	Thermococcus sp. 5-4	Yes		East Pacific Ocean Ridge, black smoker	13	-104				1854909	2059	55.69	1981	78	4	2	1	0	1	0	1399	1560	527
400	Thermococcus sp. AM4	Finished	Thermococcus sp. AM4	J. Craig Venter Institute (JCVI)	2511231053	Euryarchaeota	Thermococci	Thermococcales	Thermococcaceae	Thermococcus	Thermococcus sp. AM4	Yes	Deep sea	2600m depth in the East Pacific Rise	12.1333	-103.933			Thermophile	2086428	2272	54.78	2222	50	4	2	1	0	1	0	1443	1652	526
401	Thermococcus sp. EP1	Permanent Draft	Thermococcus sp. EP1	Third Institute of Oceanography, State Oceanic Administration	2645727876	Euryarchaeota	Thermococci	Thermococcales	Thermococcaceae	Thermococcus	Thermococcus sp. EP1	Yes								1811638	2034	39.27	1955	79	4	2	1	0	1	0	1402	1616	577
402	Thermococcus sp. EXT12c	Finished	Thermococcus sp. EXT12c genome sequencing	Universite de Bretagne Occidentale	2775506963	Euryarchaeota	Thermococci	Thermococcales	Thermococcaceae	Thermococcus	Thermococcus sp. EXT12c	Yes		deep-sea hydrothermal vent						2155760	2418	54.58	2322	96	4	2	1	0	1	0	1508	1701	578
403	Thermococcus sp. P6	Finished	Thermococcales genome sequencing	Ecole Normale Superieure de Lyon	2758568029	Euryarchaeota	Thermococci	Thermococcales	Thermococcaceae	Thermococcus	Thermococcus sp. P6	Yes								1522818	1676	54.88	1608	68	4	2	1	0	1	0	1185	1311	487
404	Thermococcus thioreducens OGL-20P	Finished	Thermococcales genome sequencing	Ecole Normale Superieure de Lyon	2773858064	Euryarchaeota	Thermococci	Thermococcales	Thermococcaceae	Thermococcus	Thermococcus thioreducens	Yes			36.2	-33.9				2065932	2390	53.45	2303	87	3	1	1	0	1	0	1445	1658	530
405	Thermococcus zilligii AN1	Permanent Draft	Thermococcus zilligii AN1	Korea Research Institute of Bioscience and Biotechnology	2547132157	Euryarchaeota	Thermococci	Thermococcales	Thermococcaceae	Thermococcus	Thermococcus zilligii	Yes			-38.13	176.25				1764559	1940	54.48	1857	83	4	2	1	0	1	0	1284	1474	520
406	Thermofilum adornatus 1910b	Finished	Thermofilum adornatus 1910b Genome sequencing	Baltic Federal University	2554235458	Crenarchaeota	Thermoprotei	Thermoproteales	Thermofilaceae	Thermofilum	Thermofilum adornatus	Yes		mud sample from a black mud pit					Thermophile	1750259	1942	46.51	1896	46	3	1	1	0	1	0	1140	1348	524
407	Thermofilum pendens Hrk 5	Finished	Diverse archaeal organisms	DOE Joint Genome Institute (JGI)	639633064	Crenarchaeota	Thermoprotei	Thermoproteales	Thermofilaceae	Thermofilum	Thermofilum pendens	Yes	Hot spring	Solfataric hot spring in Iceland					Hyperthermophile	1813393	1930	57.65	1883	47	3	1	1	0	1	0	1120	1361	534
408	Thermofilum uzonense 1807-2	Finished	Thermofilum uzonense 1807-2	Baltic Federal University	2639762927	Crenarchaeota	Thermoprotei	Thermoproteales	Thermofilaceae	Thermofilum	Thermofilum uzonense	Yes		gray-white mud pit from a hot spring						1611988	1739	47.94	1685	54	3	1	1	0	1	0	1059	1208	508
409	Thermogladius calderae 1633	Finished	Thermogladius calderae 1633	Russian Academy of Science, Centre Bioengineering	2521172705	Crenarchaeota	Thermoprotei	Desulfurococcales	Desulfurococcaceae	Thermogladius	Thermogladius calderae	Yes	Hot spring	hot spring in the Uzon Caldera in Kamchatka (Russia)	54.5	159.96	7.1		Hyperthermophile	1356318	1463	55.64	1414	49	3	1	1	0	1	0	949	1058	461
410	Thermoplasma acidophilum DSM 1728	Finished	Thermoplasma acidophilum DSM 1728	Eurofins Medigenomix GmbH, Max Planck Institute	638154521	Euryarchaeota	Thermoplasmata	Thermoplasmatales	Thermoplasmataceae	Thermoplasma	Thermoplasma acidophilum	Yes	Solfataric field	Self-heating coal refuse pile in southwestern Indiana			0.5-4		Thermophile	1564906	1580	45.99	1527	53	3	1	1	0	1	0	1141	1230	562
411	Thermoplasma volcanium GSS1	Finished	Thermoplasma volcanium GSS1	National Institute of Advanced Industrial Science and Technology, AIST	638154522	Euryarchaeota	Thermoplasmata	Thermoplasmatales	Thermoplasmataceae	Thermoplasma	Thermoplasma volcanium	Yes	Hot spring	Acidic hydrothermal vents on the shore of Aeolian Island of Vulcano Italy	38.4879	14.9456	43834		Thermophile	1584804	1615	39.92	1561	54	3	1	1	0	1	0	1124	1227	547
412	Thermoproteus tenax Kra1	Finished	Thermoproteus tenax Kra1	Epidauros Biotechnologie AG	2511231093	Crenarchaeota	Thermoprotei	Thermoproteales	Thermoproteaceae	Thermoproteus	Thermoproteus tenax	Yes	Fresh water	Mud hole, acidic solfataric field in Iceland					Thermophile	1841542	2098	55.13	2049	49	3	1	1	0	1	0	1280	1440	653
413	Thermoproteus uzoniensis 768-20	Finished	Thermoproteus uzoniensis 768-20	Russian Academy of Science, Centre Bioengineering	650716098	Crenarchaeota	Thermoprotei	Thermoproteales	Thermoproteaceae	Thermoproteus	Thermoproteus uzoniensis	Yes	Fresh water	solfataric thermal field close to Moutnovsky volcano, Kamchatka			5.5		Thermophile	1936063	2224	59.66	2186	38	3	1	1	0	1	0	1305	1505	637
414	Thermosphaera aggregans M11TL, DSM 11486	Finished	A Genomic Encyclopedia of Bacteria and Archaea (GEBA)	DOE Joint Genome Institute (JGI)	646564583	Crenarchaeota	Thermoprotei	Desulfurococcales	Desulfurococcaceae	Thermosphaera	Thermosphaera aggregans	Yes	Hot spring	Hot spring from Obsidian Pool at Yellowstone Natl. Park	44.806	-110.448	6.5		Hyperthermophile	1316595	1457	46.73	1410	47	3	1	1	0	1	0	889	1021	408
415	Vulcanisaeta distributa DSM 14429	Finished	A Genomic Encyclopedia of Bacteria and Archaea (GEBA)	DOE Joint Genome Institute (JGI)	648028062	Crenarchaeota	Thermoprotei	Thermoproteales	Thermoproteaceae	Vulcanisaeta	Vulcanisaeta distributa	Yes	Hot spring	Hot spring from Kanagawa, Ohwakudani, Japan on 9/1993	35.447	139.642	4-4.5		Hyperthermophile	2374137	2592	45.43	2543	49	3	1	1	0	1	0	1392	1687	678
416	Vulcanisaeta moutnovskia 768-28	Finished	Vulcanisaeta moutnovskia 768-28	Russian Academy of Science, Centre Bioengineering	650377985	Crenarchaeota	Thermoprotei	Thermoproteales	Thermoproteaceae	Vulcanisaeta	Vulcanisaeta moutnovskia	Yes		solfataric thermal field close to Moutnovsky volcano, Kamchatka	52.608	158.19			Hyperthermophile	2298983	2365	42.39	2320	45	3	1	1	0	1	0	1350	1584	645
417	Vulcanisaeta thermophila CBA1501	Permanent Draft	Vulcanisaeta thermophila CBA1501 genome sequencing	Korea Basic Science Institute (KBSI)	2791354985	Crenarchaeota	Thermoprotei	Thermoproteales	Thermoproteaceae	Vulcanisaeta	Vulcanisaeta thermophila	Yes			13.15	123.419				2022594	2216	49.08	2169	47	3	1	1	0	1	0	1315	1535	648
